# Supplementary material
Source: ML conference proceedings conference paper supplement (https://aclanthology.org/2025.bionlp-1.24)
Supplement: SupplementaryMaterial [file 2025.bionlp-1.24.SupplementaryMaterial.zip]

**(A) Task Type**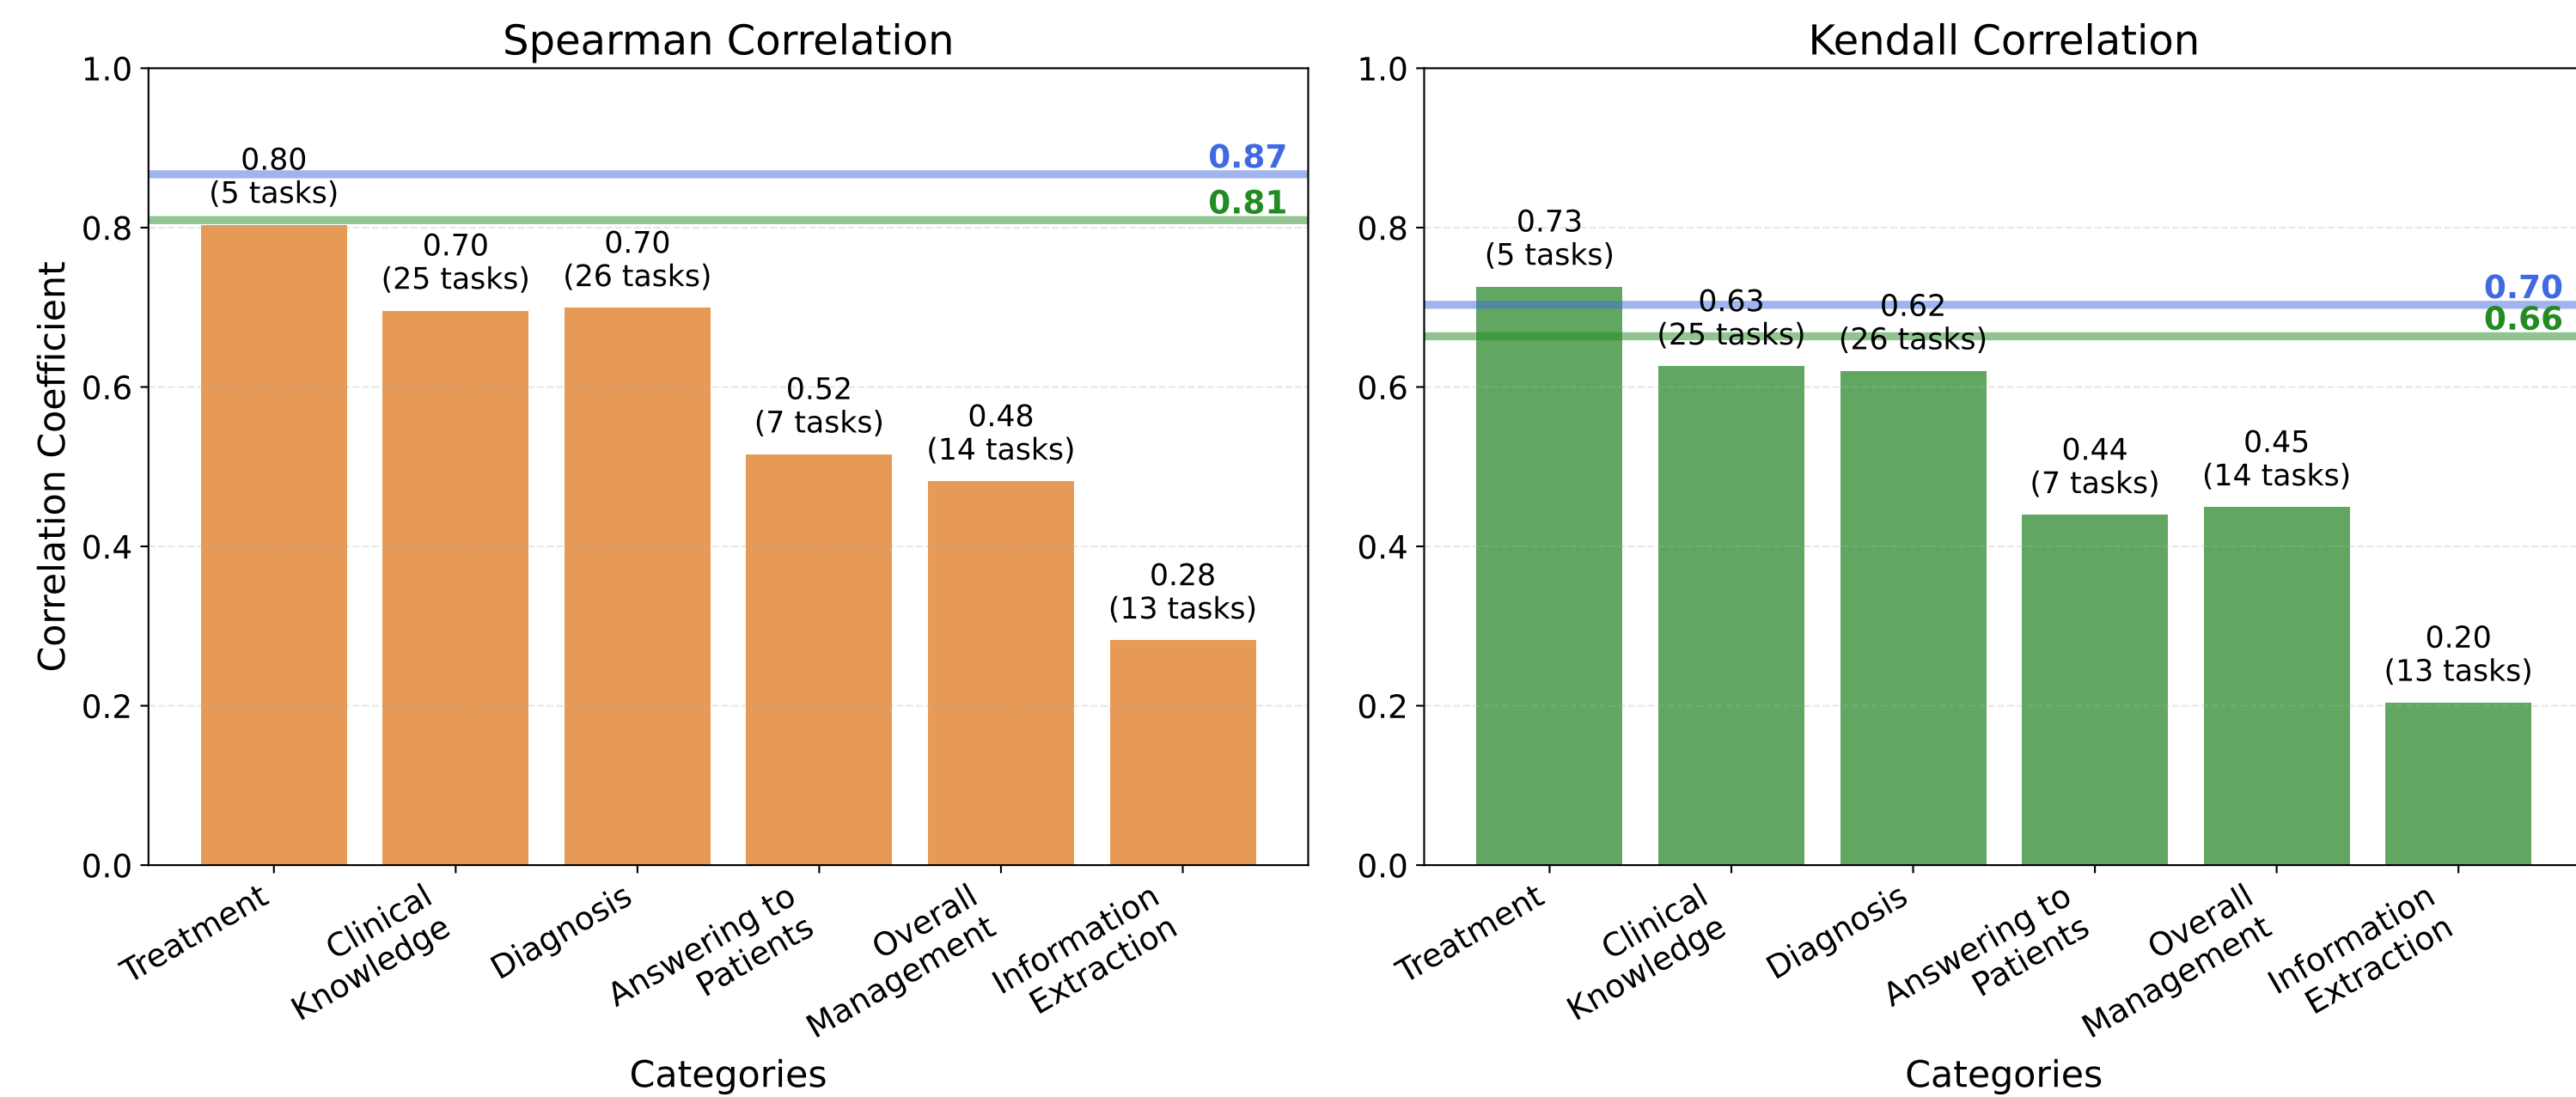**(B) Therapeutic Area**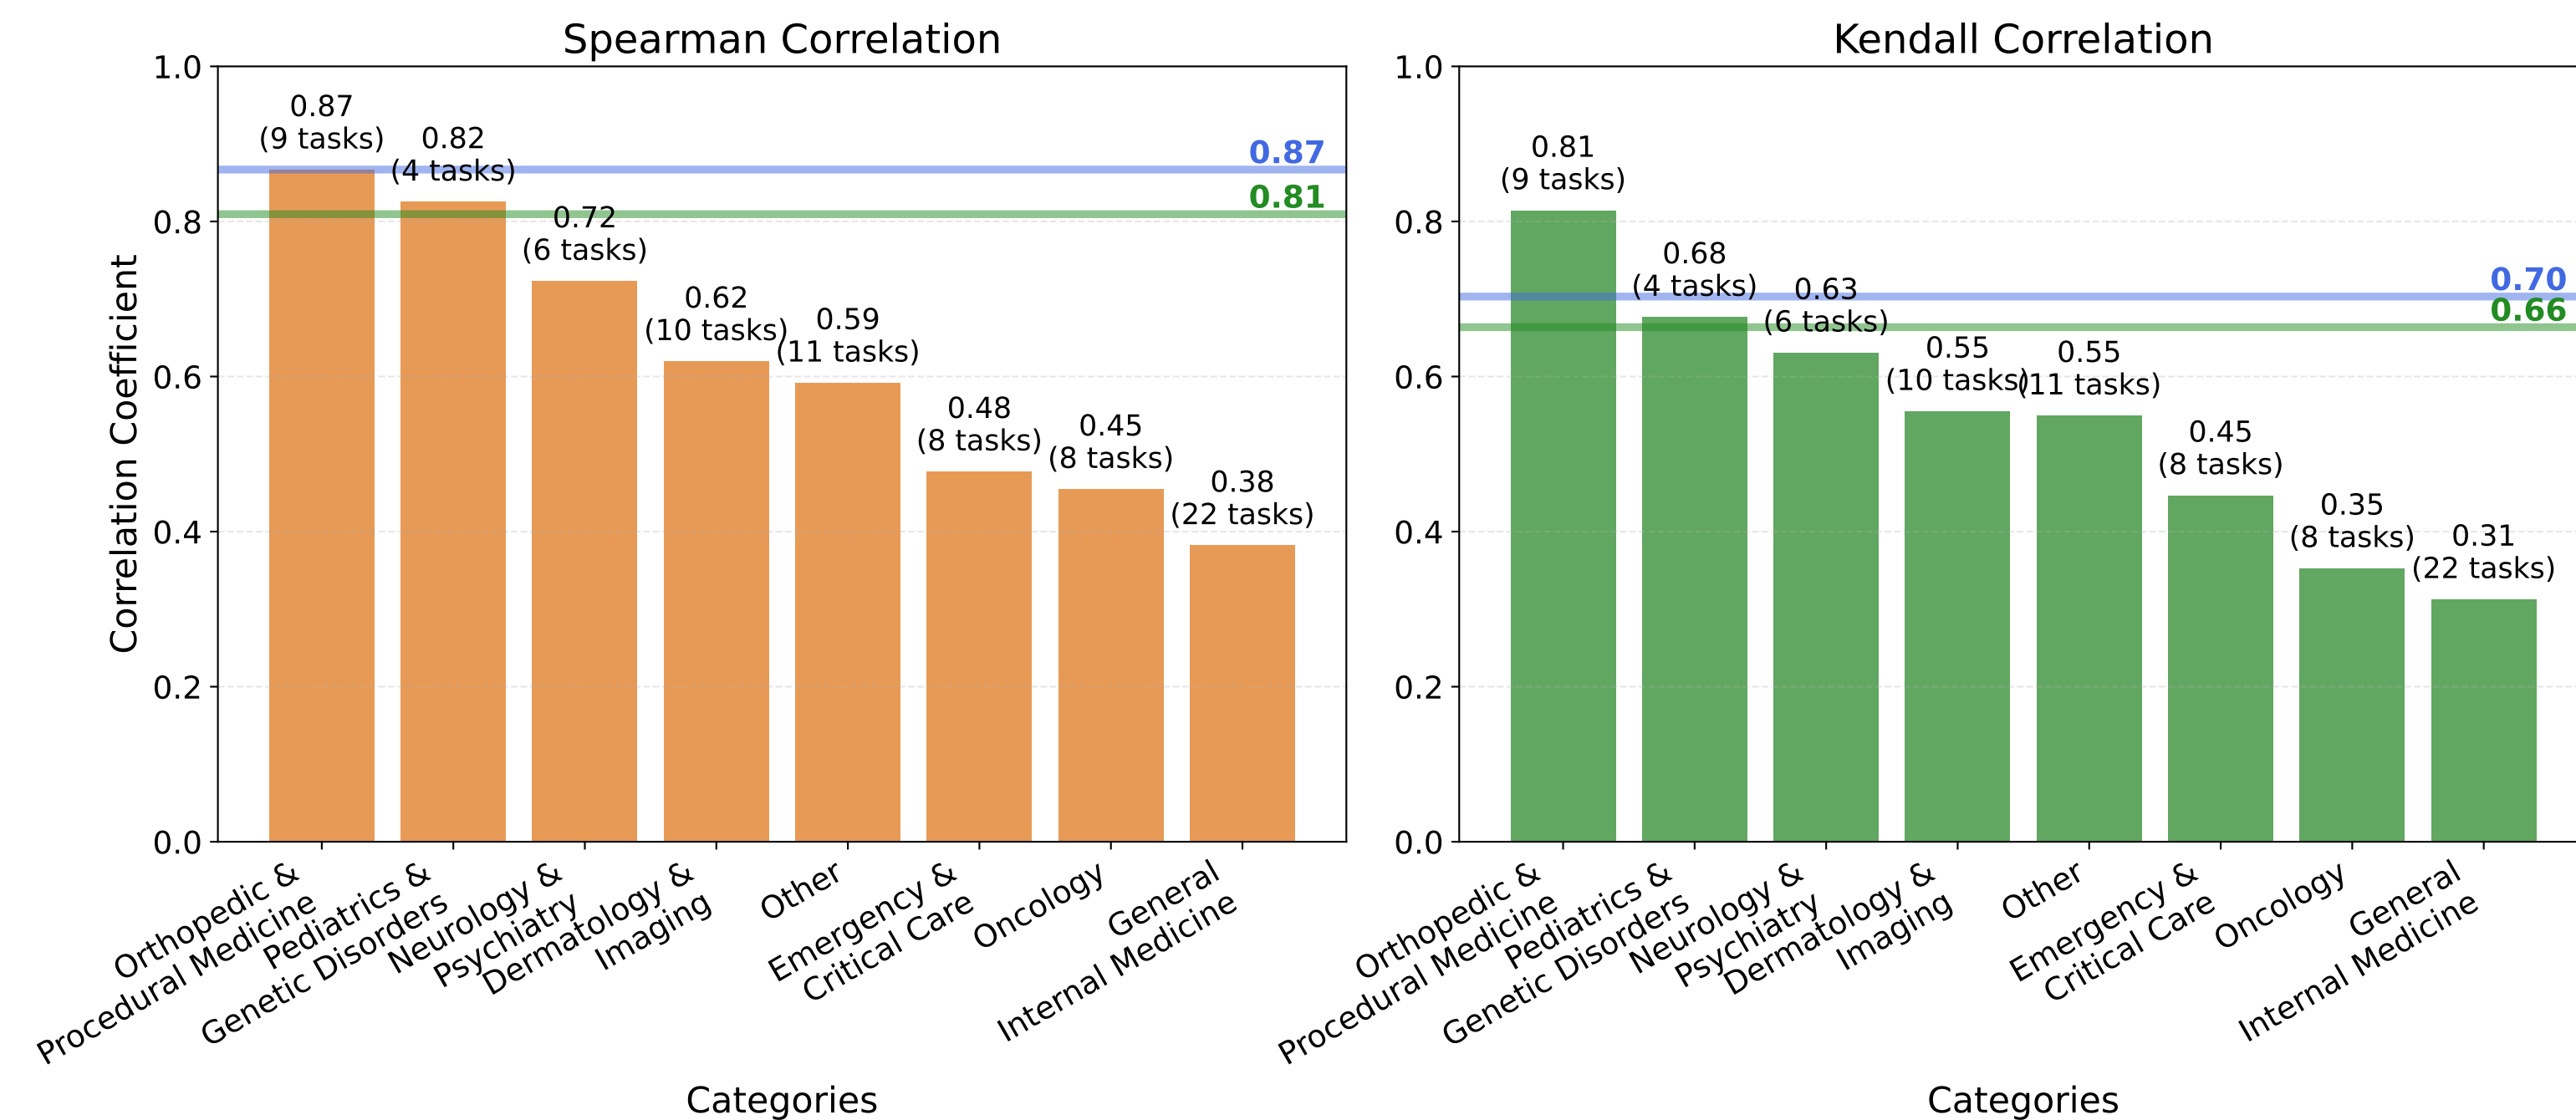**(C) Data Source**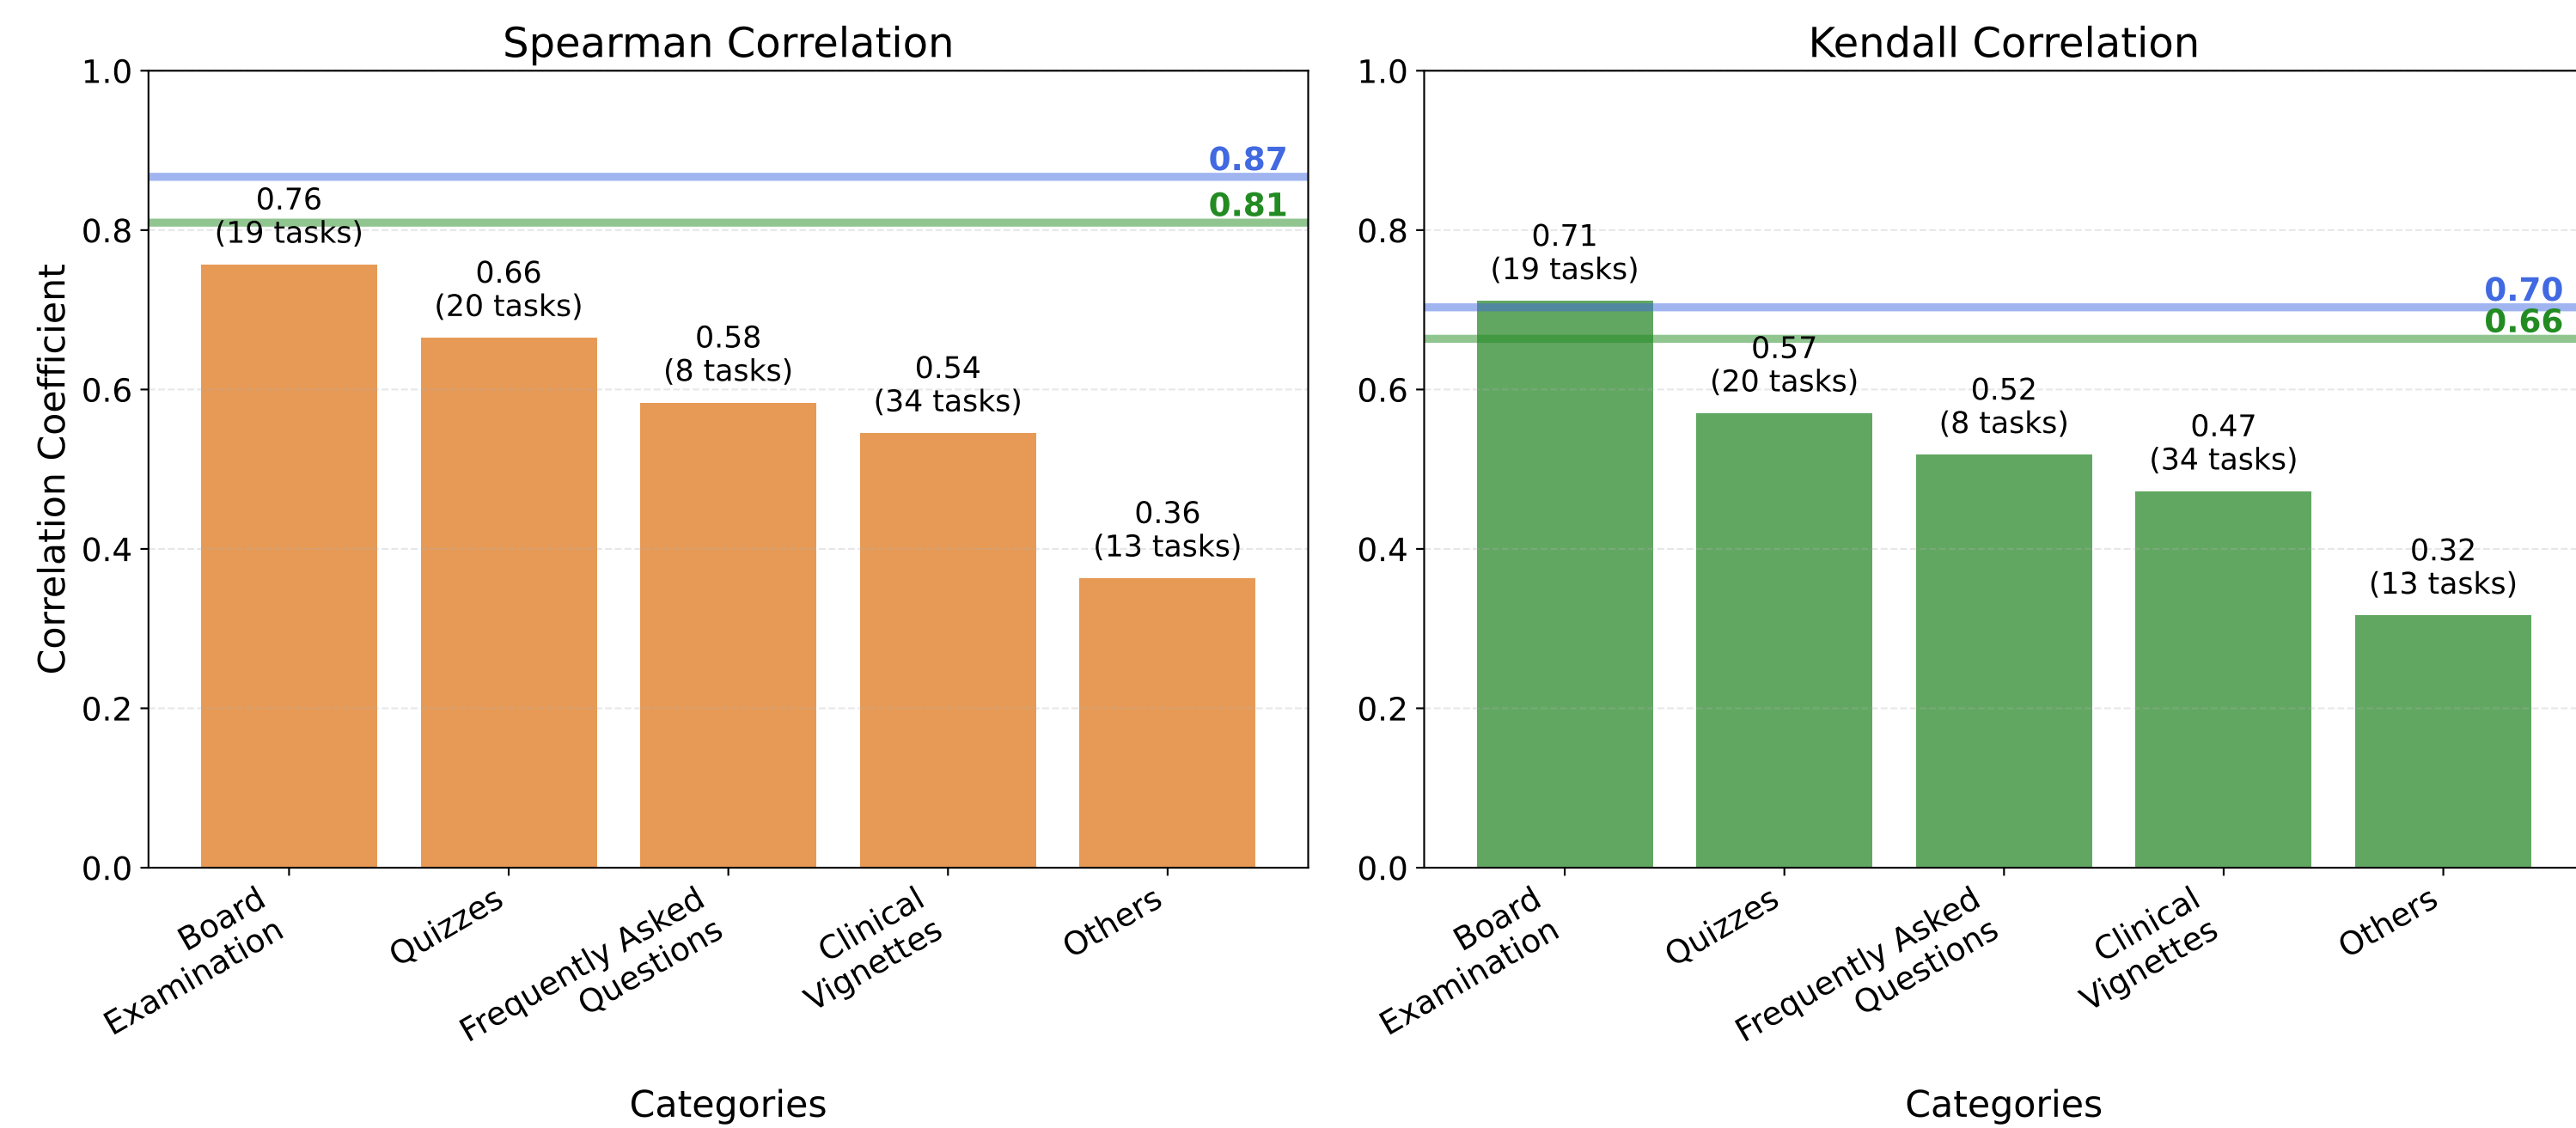**(D) Evaluation Type**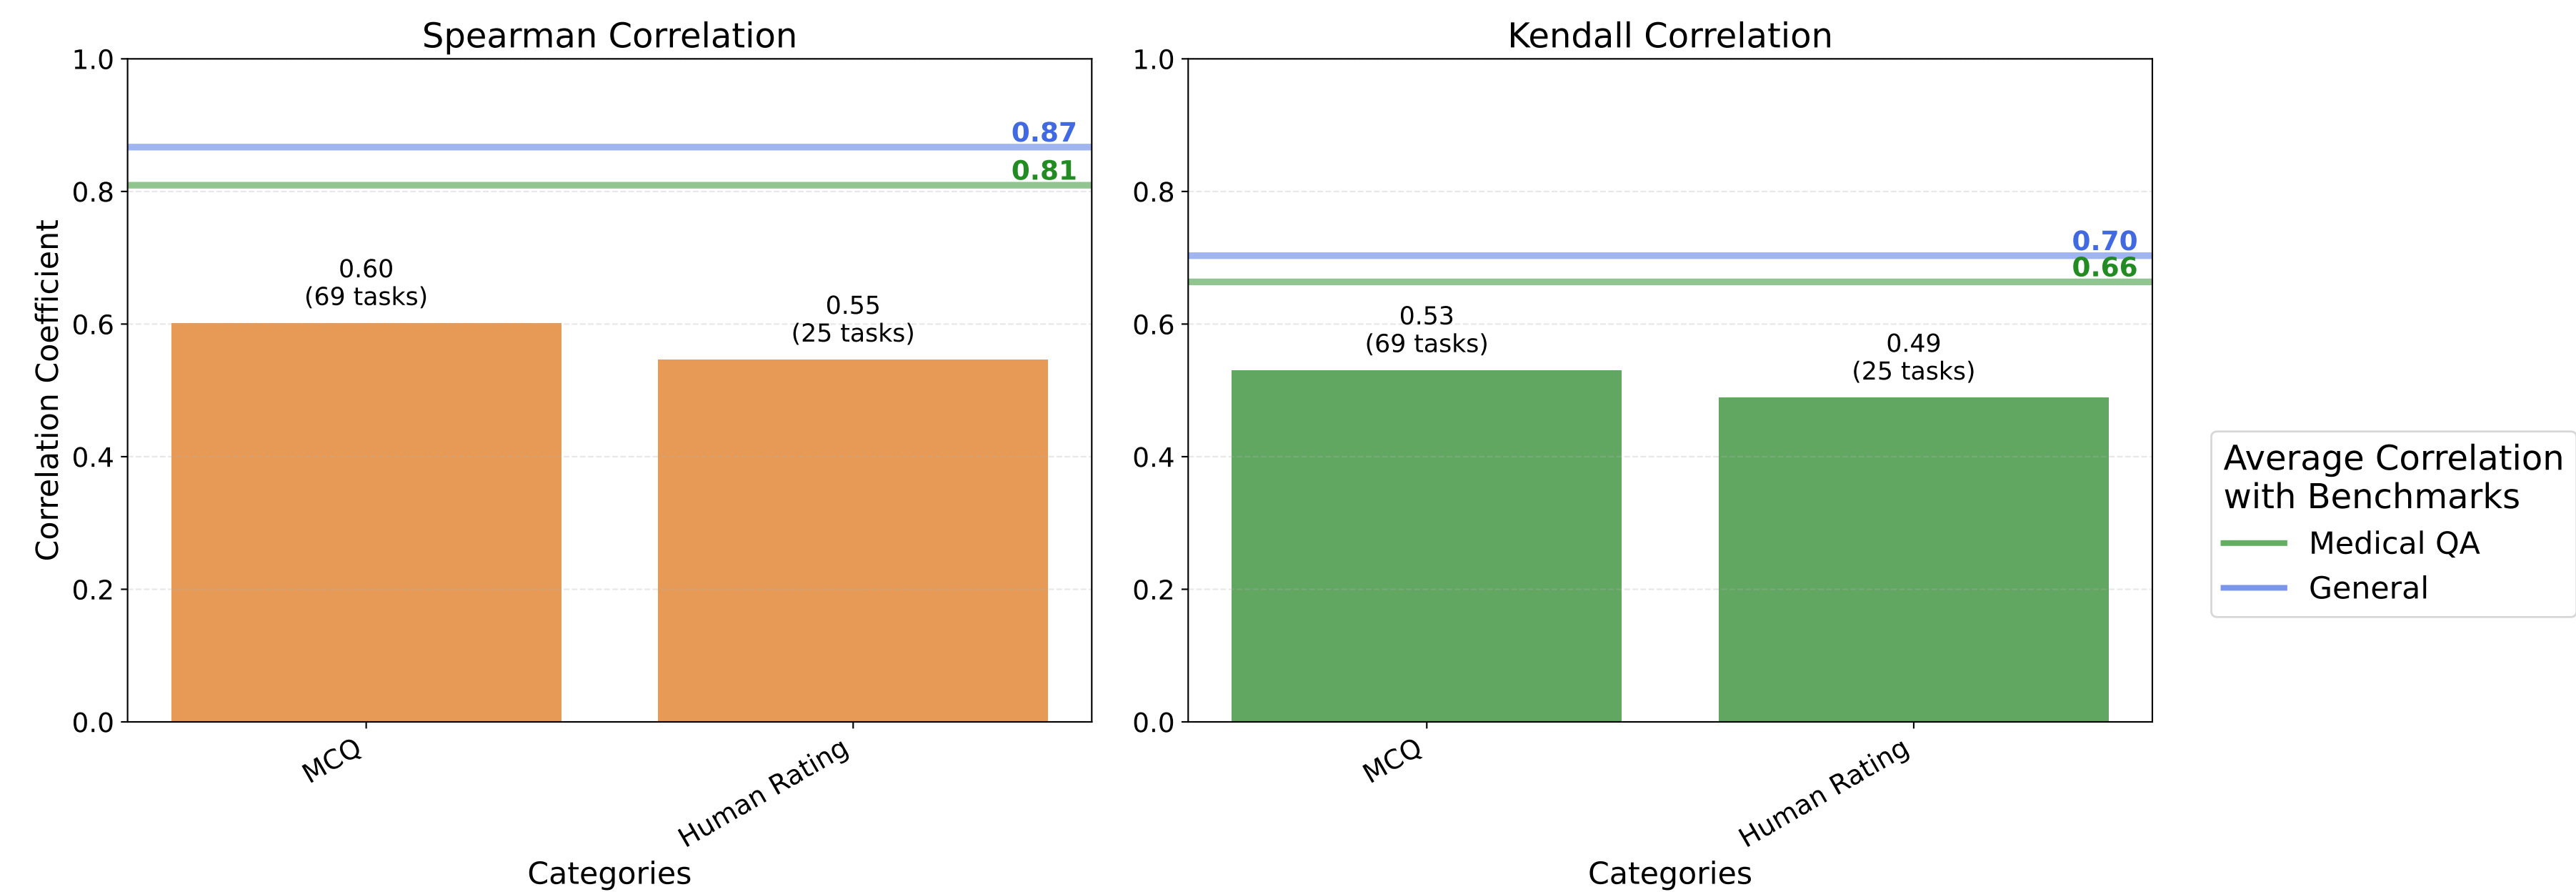

Average Correlation with Benchmarks

- Medical QA
- General
