# Supplementary material
Source: ML conference proceedings conference paper supplement (https://aclanthology.org/2025.bionlp-1.24)

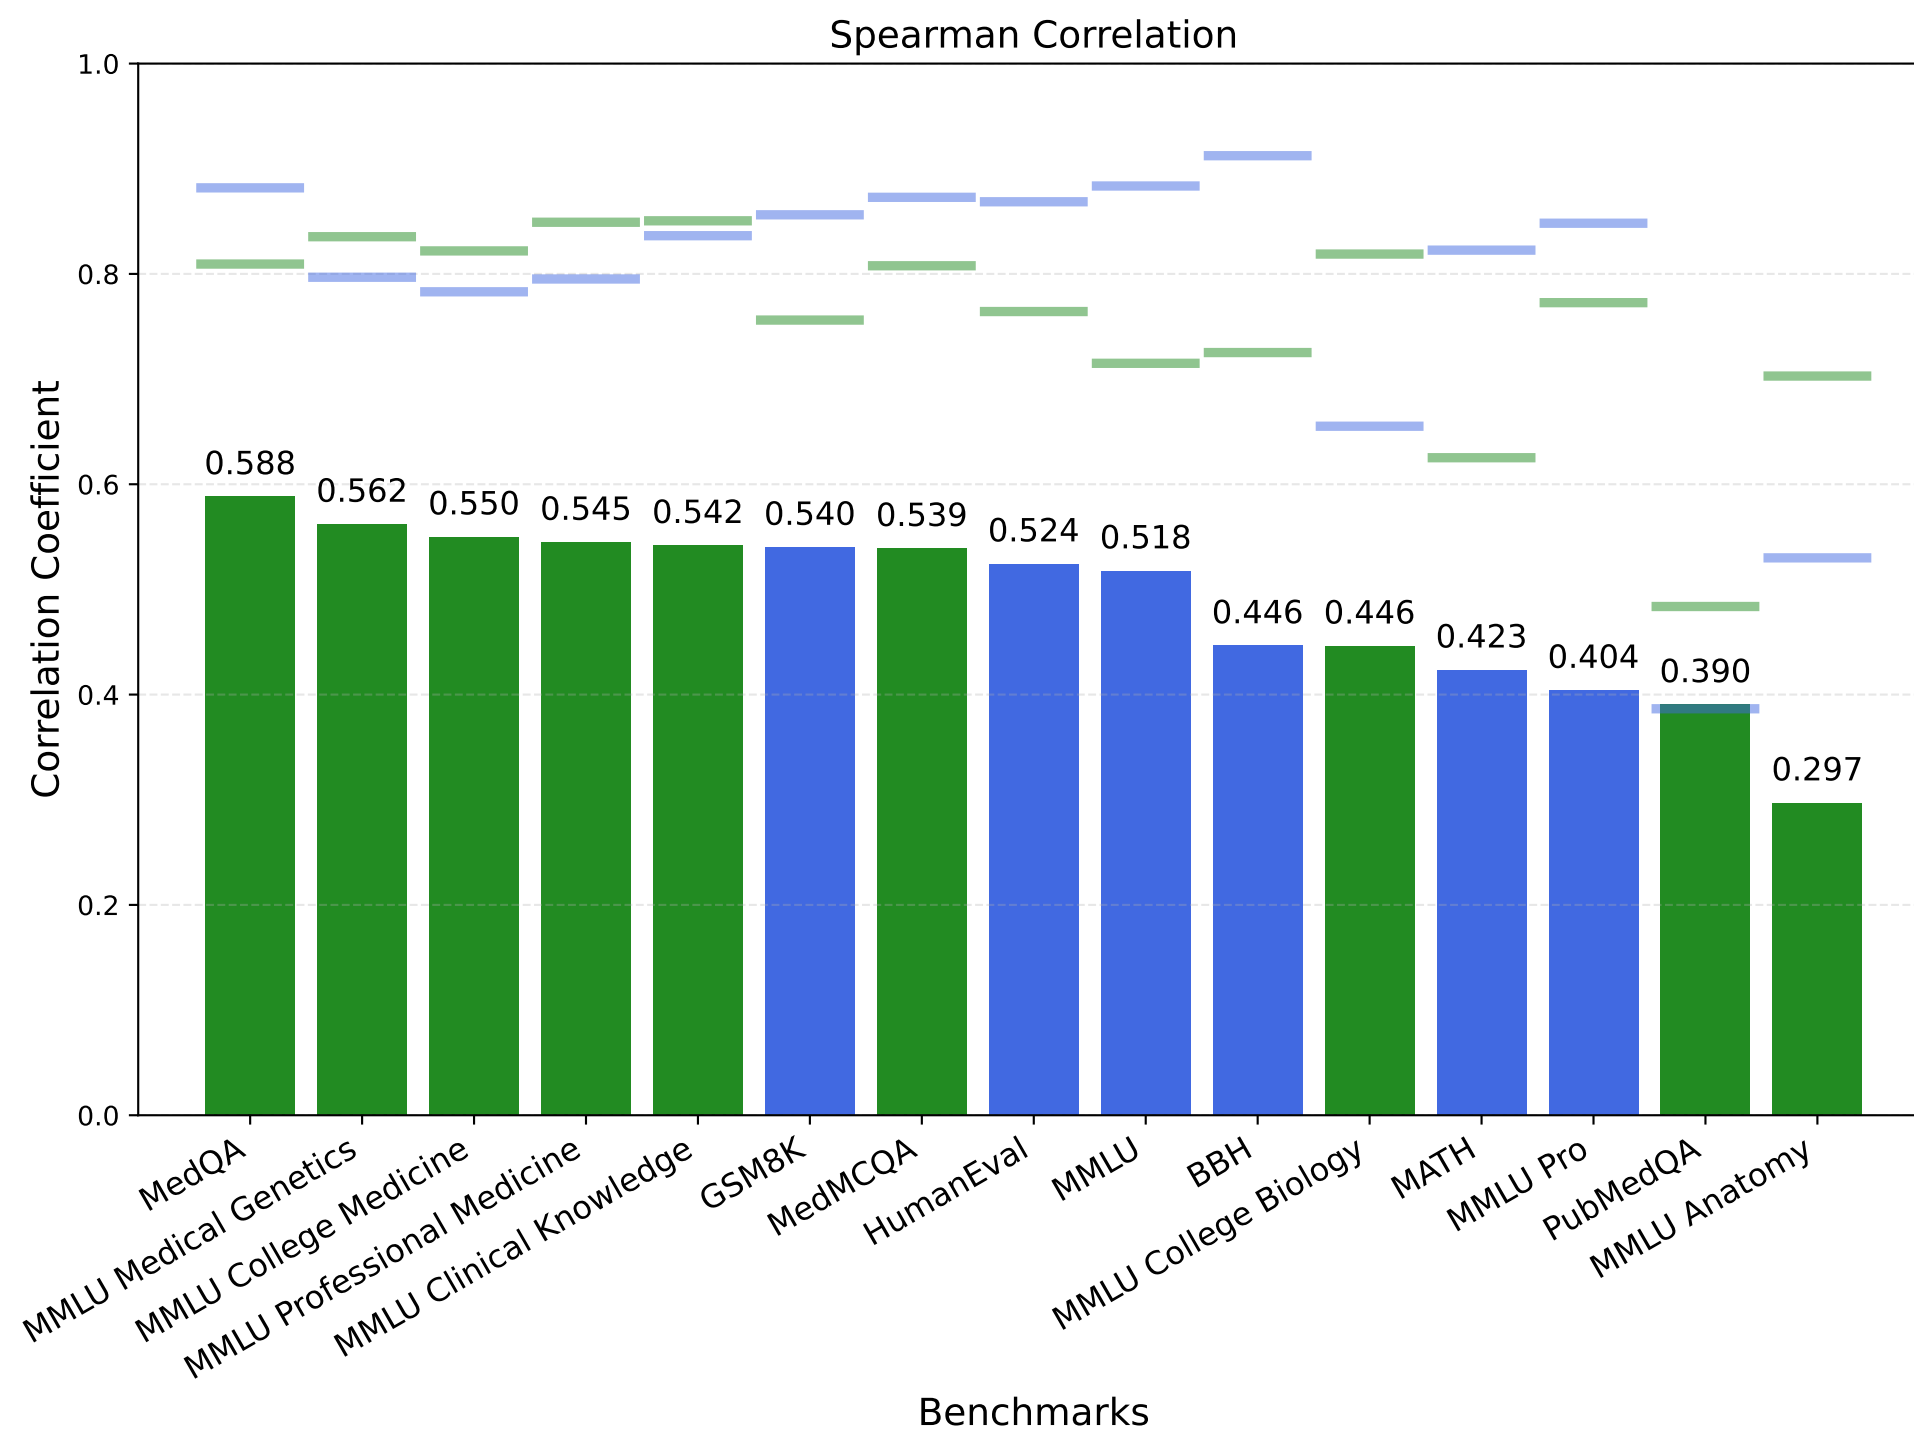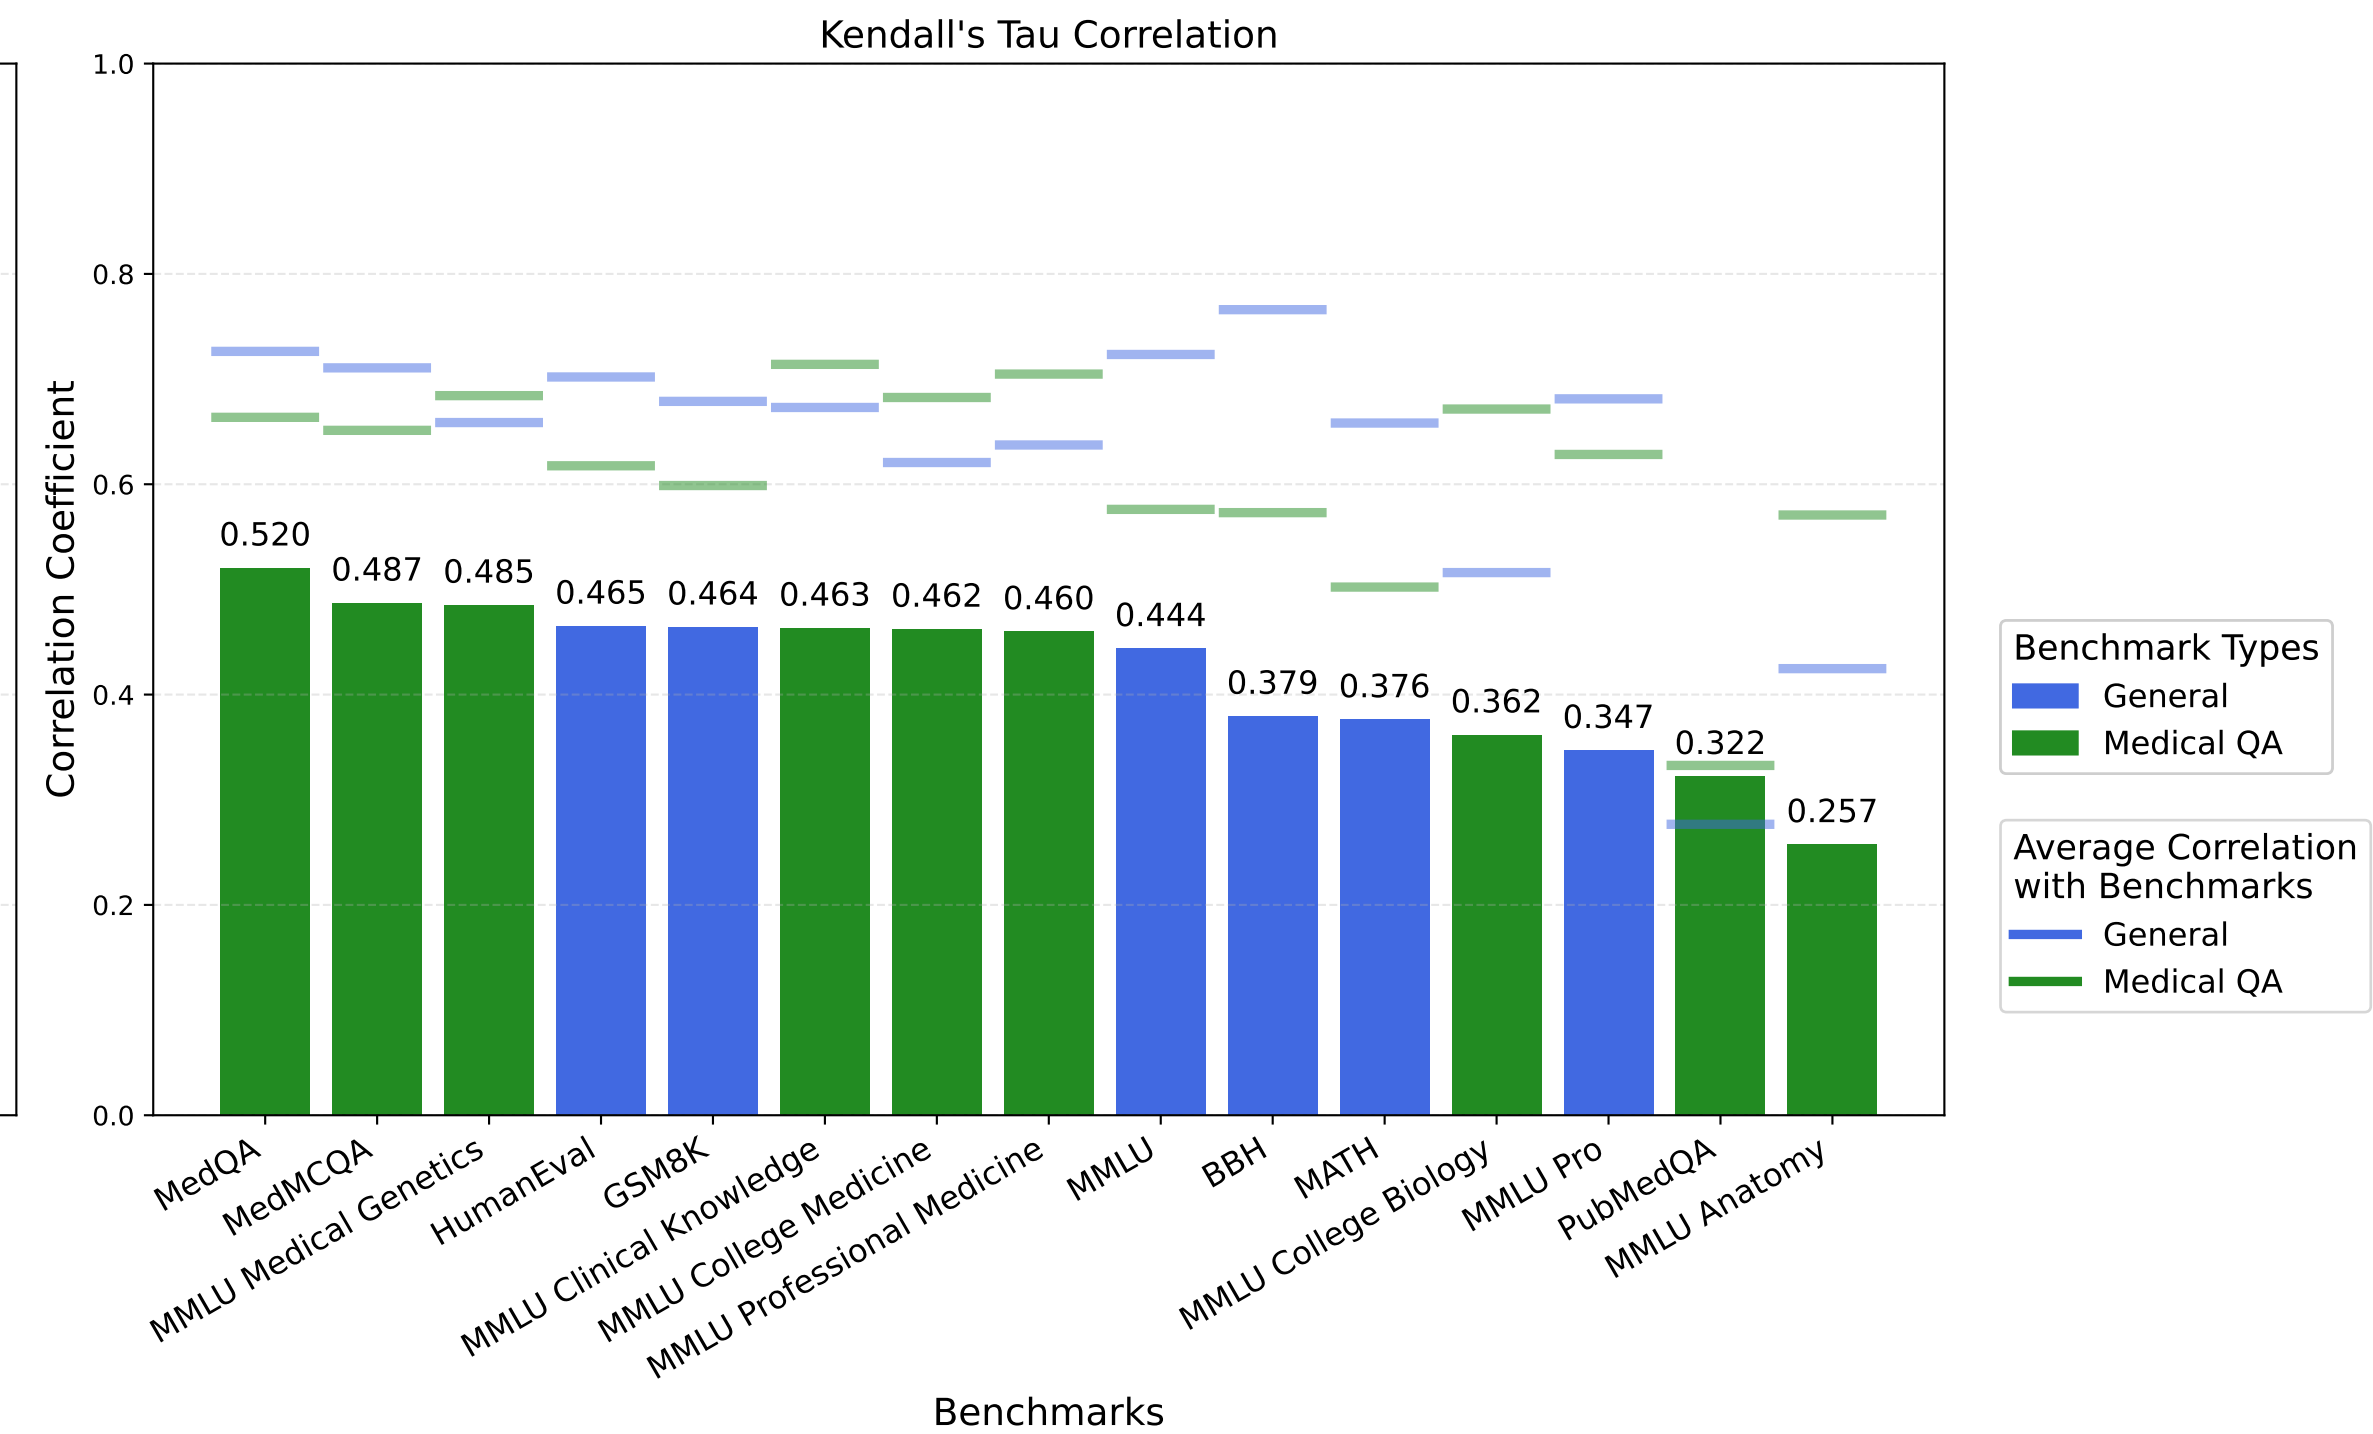

Supplement: SupplementaryMaterial [file 2025.bionlp-1.24.SupplementaryMaterial.zip]

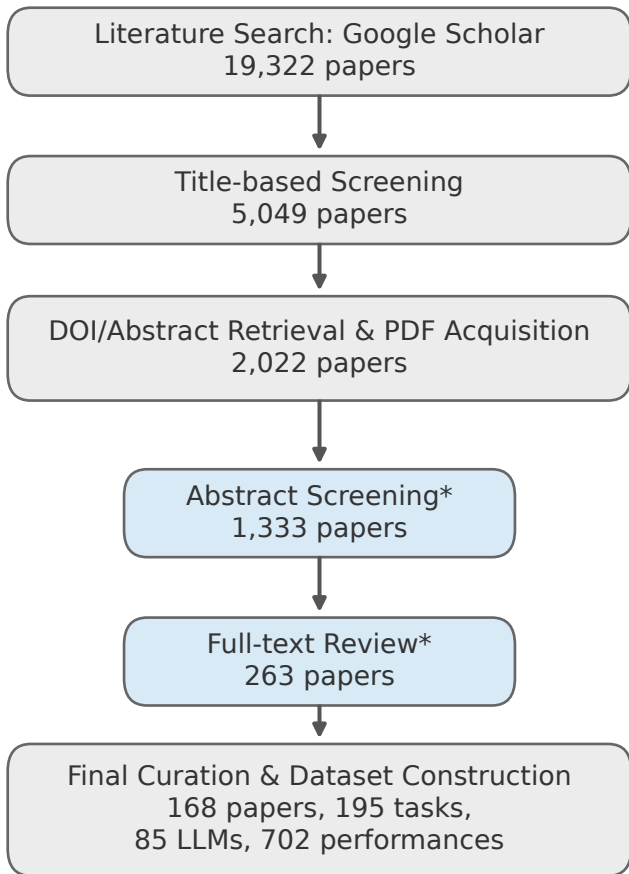

*\* Steps involving LLM assistance*

Supplement: SupplementaryMaterial [file 2025.bionlp-1.24.SupplementaryMaterial.zip]

### (A) Pearson Correlation

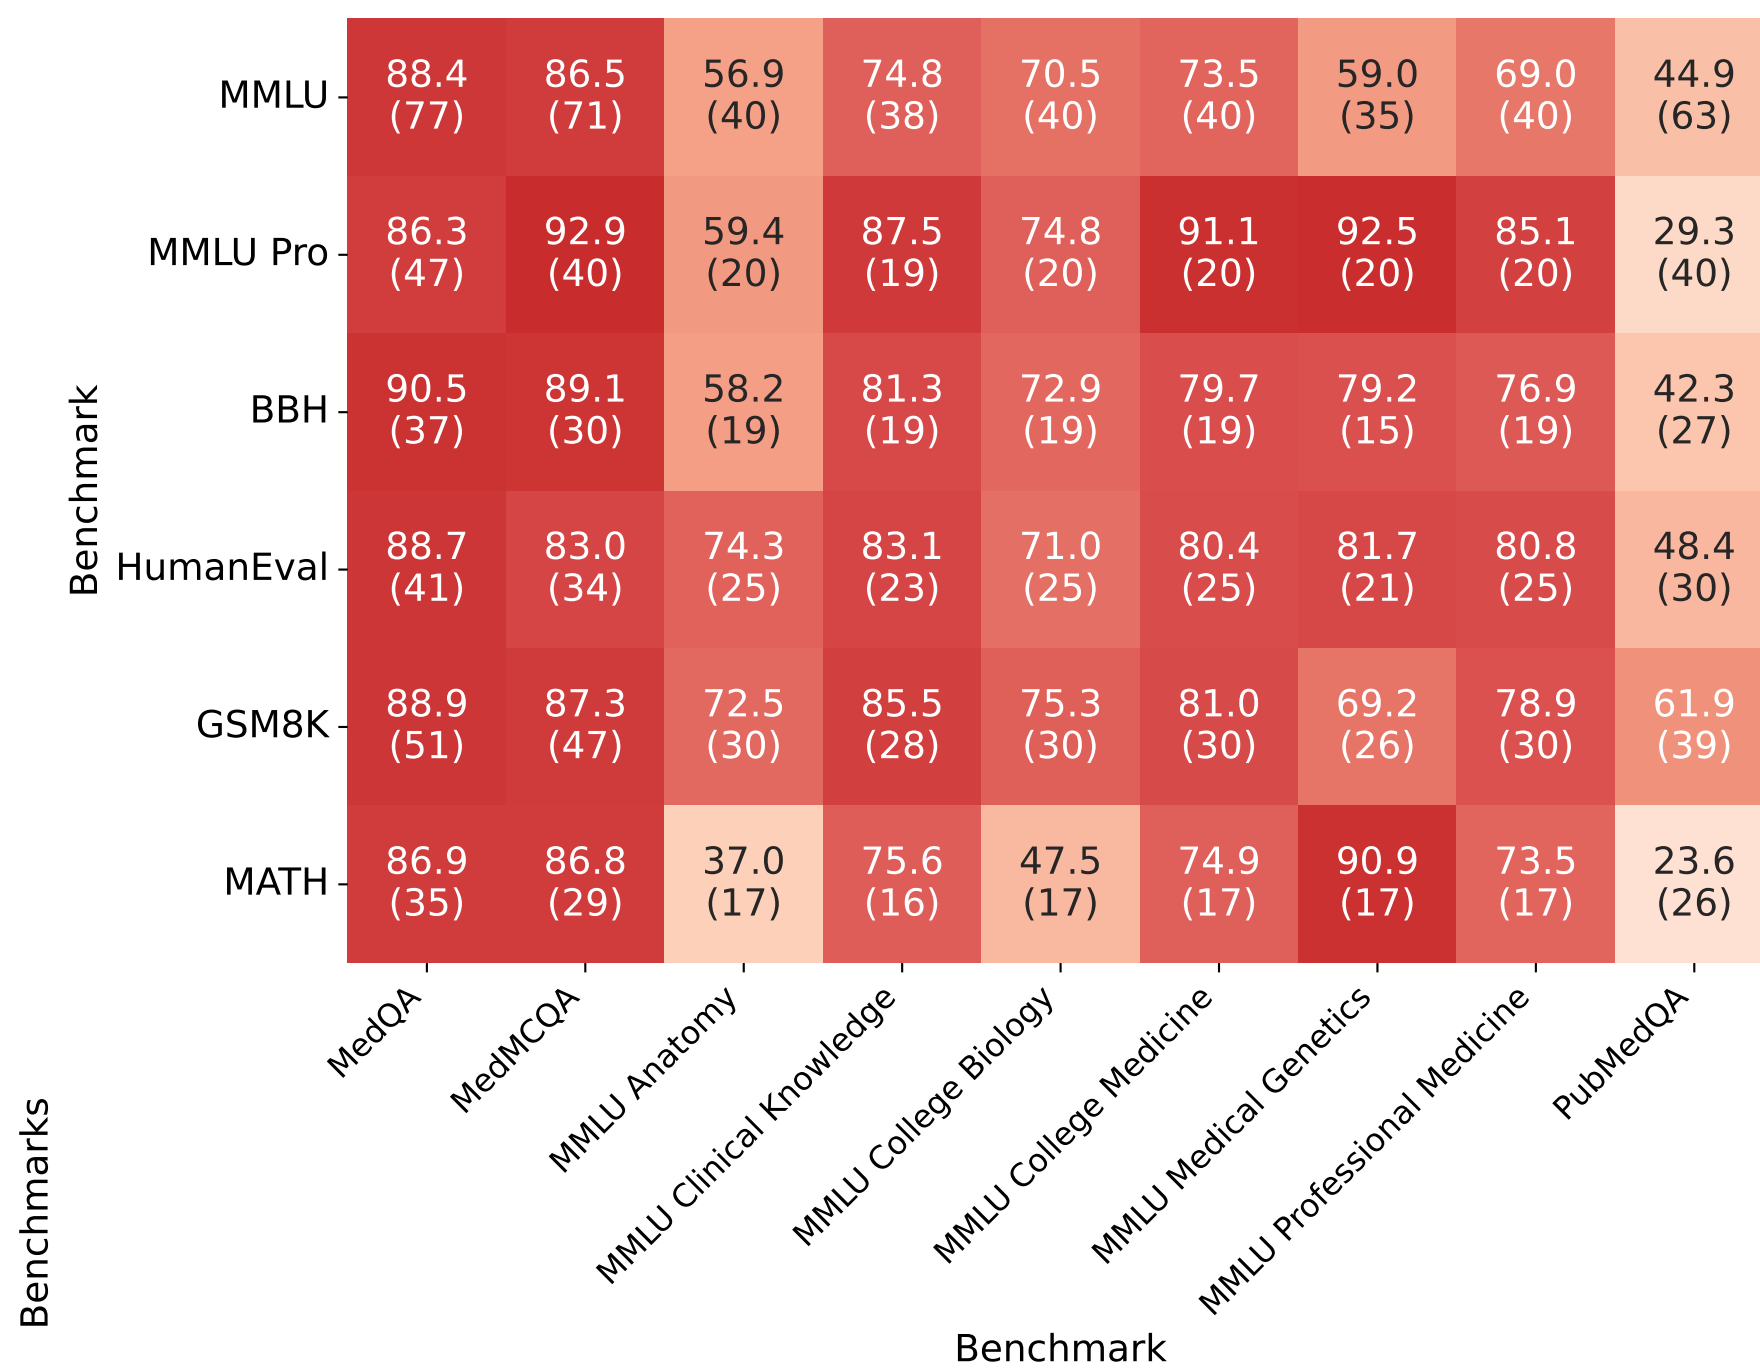

### (B) Spearman Correlation

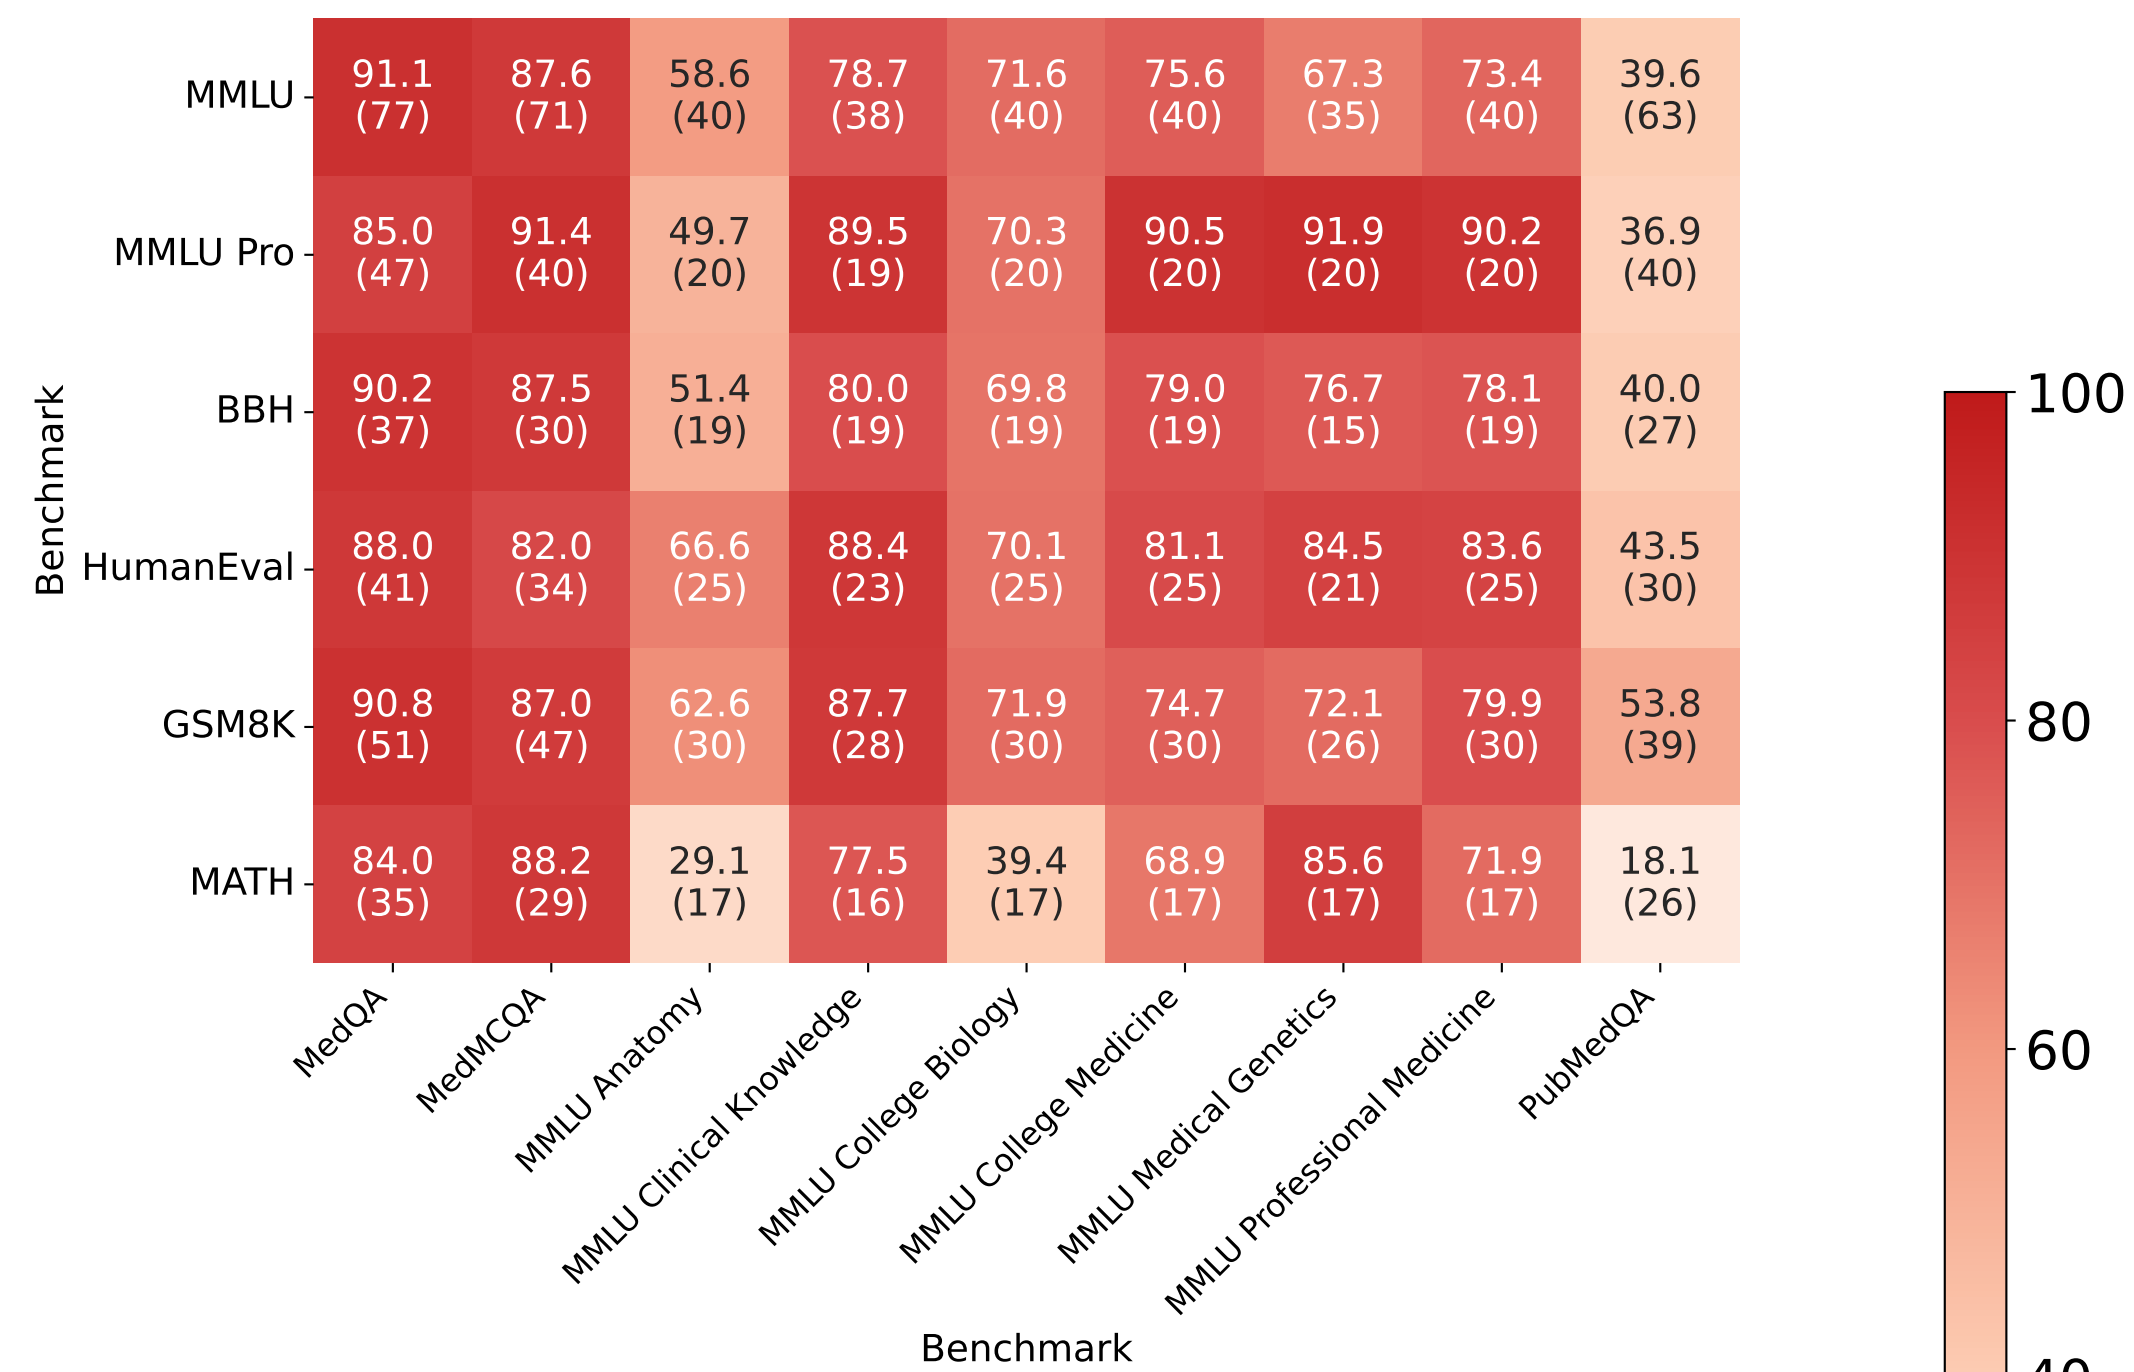

### (C) Kendall's Tau Correlation

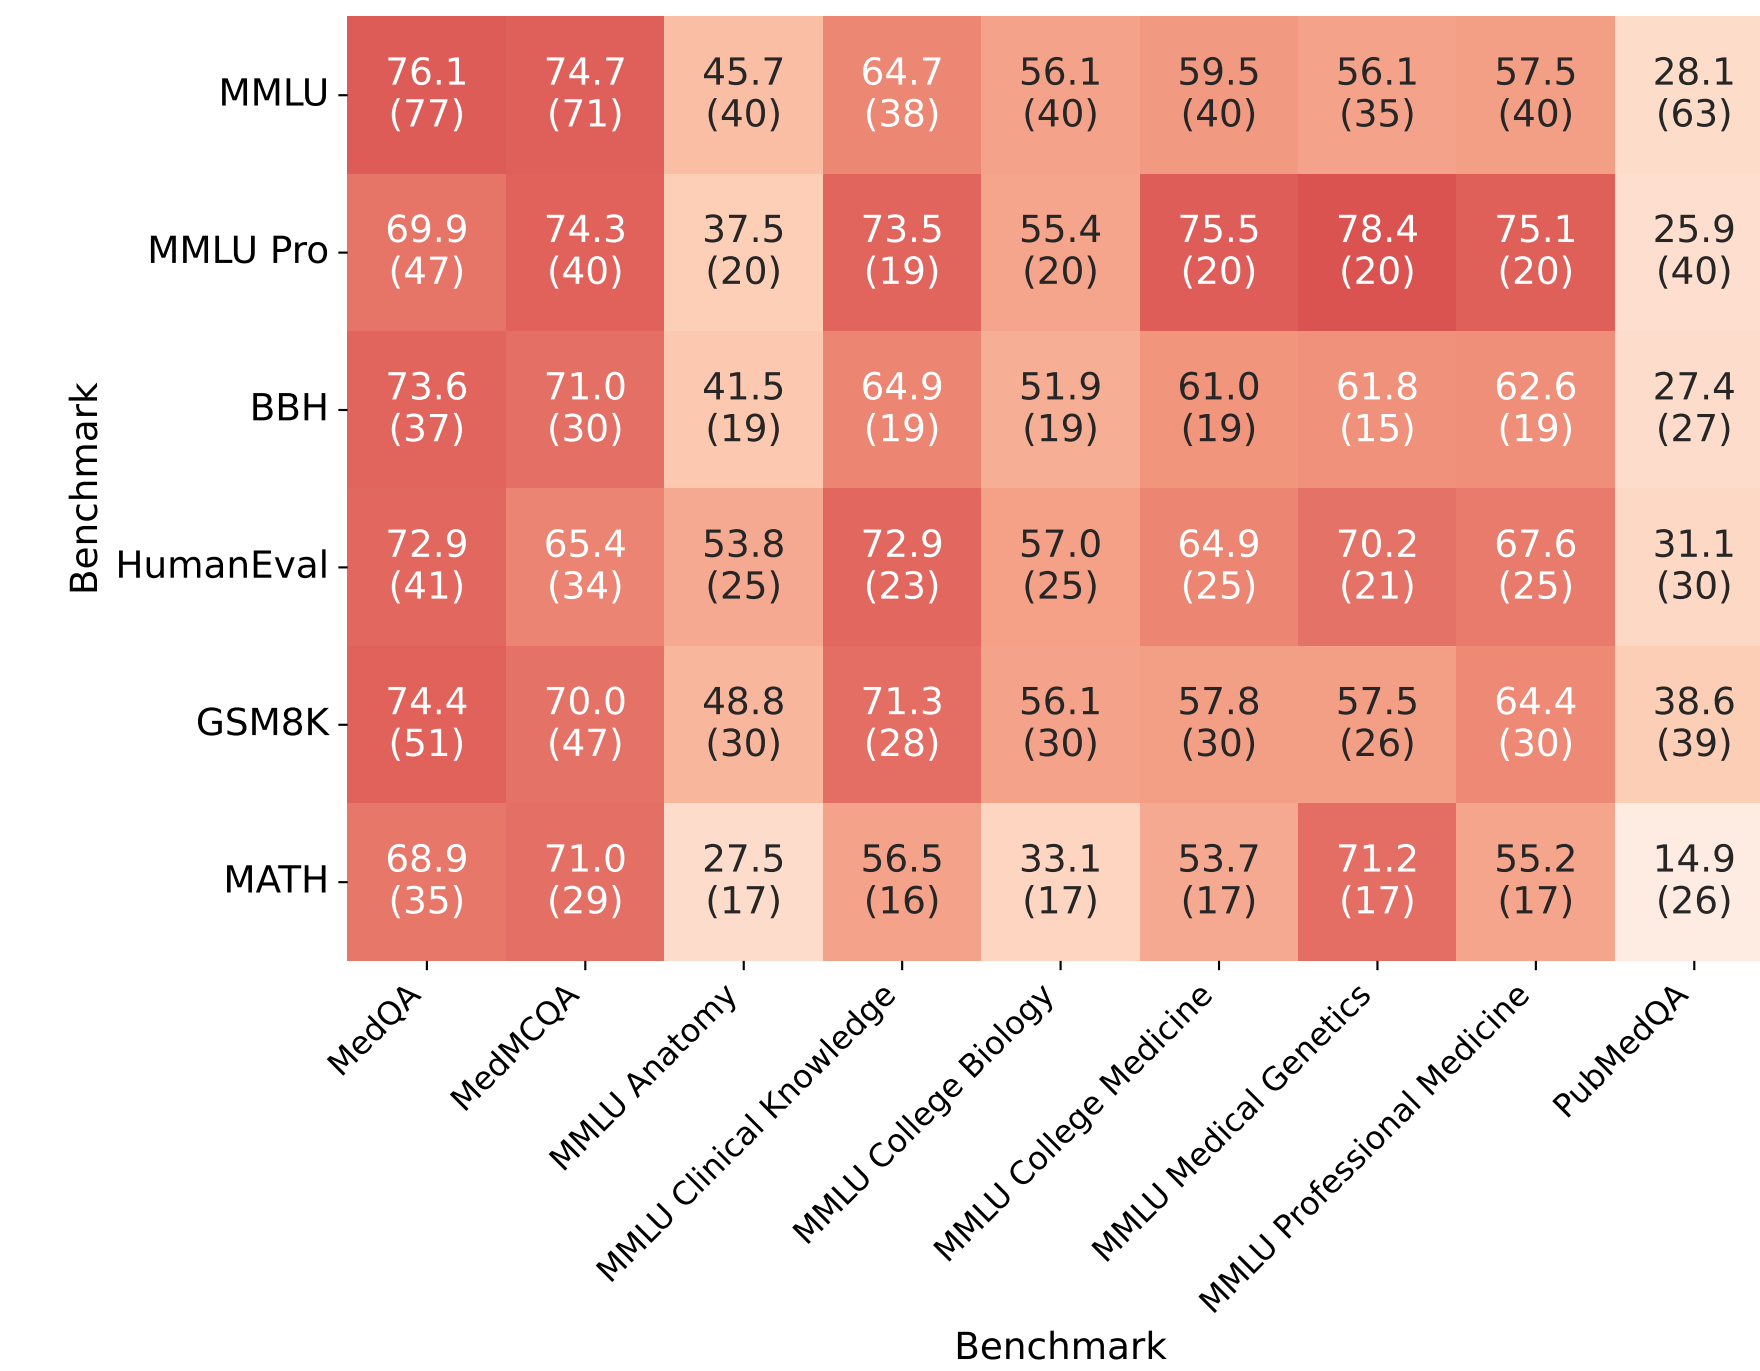

**(D) Lin's CCC**

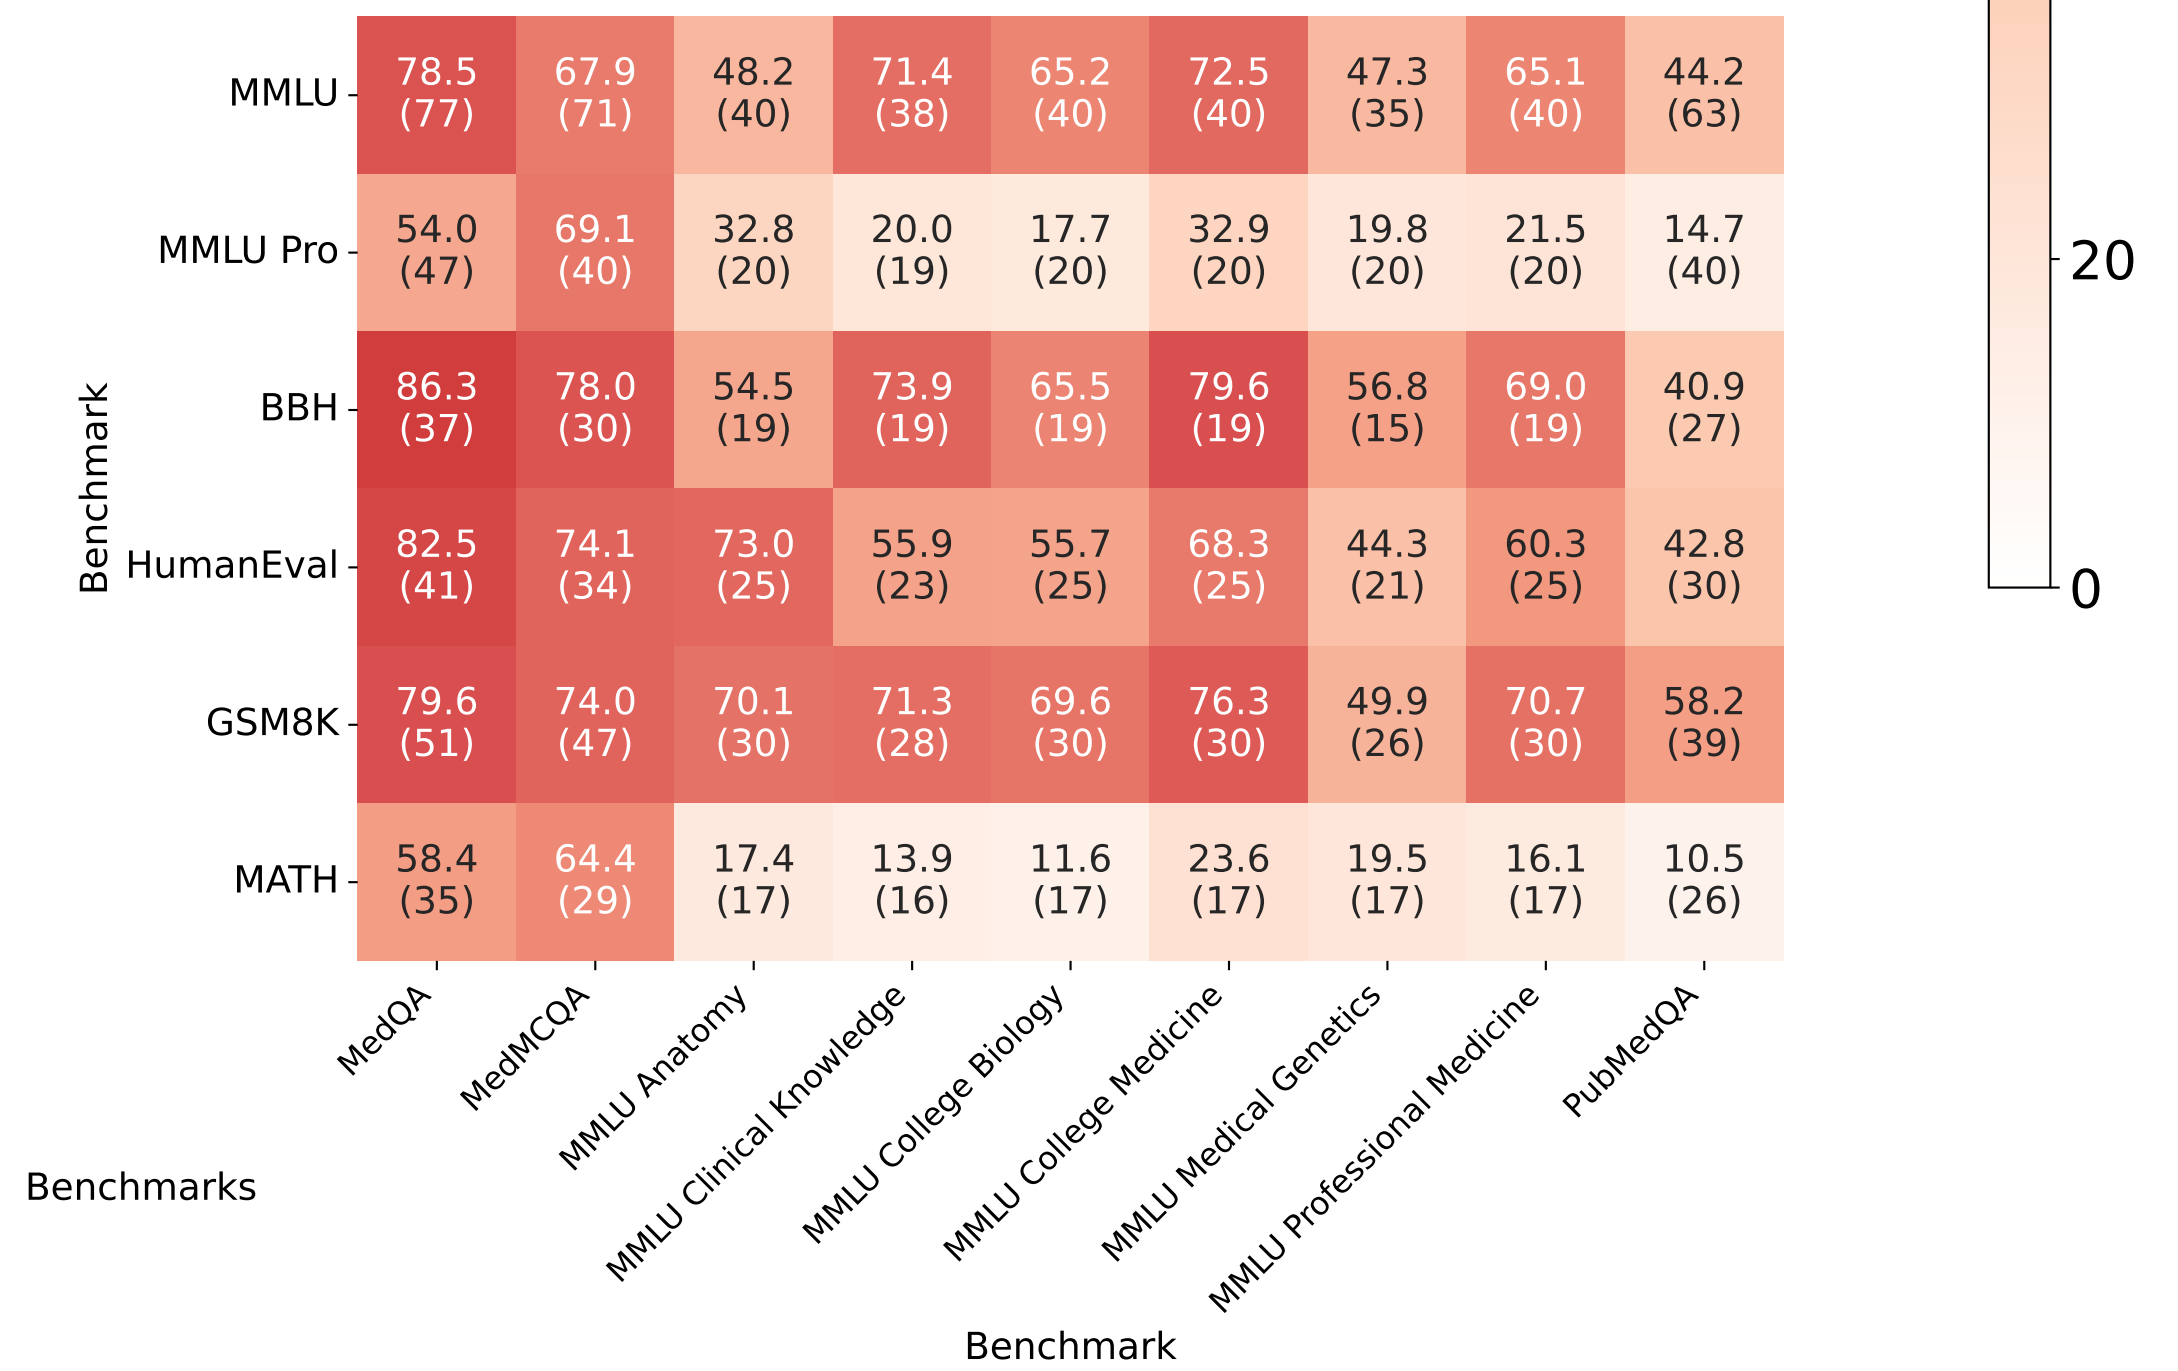

Supplement: SupplementaryMaterial [file 2025.bionlp-1.24.SupplementaryMaterial.zip]

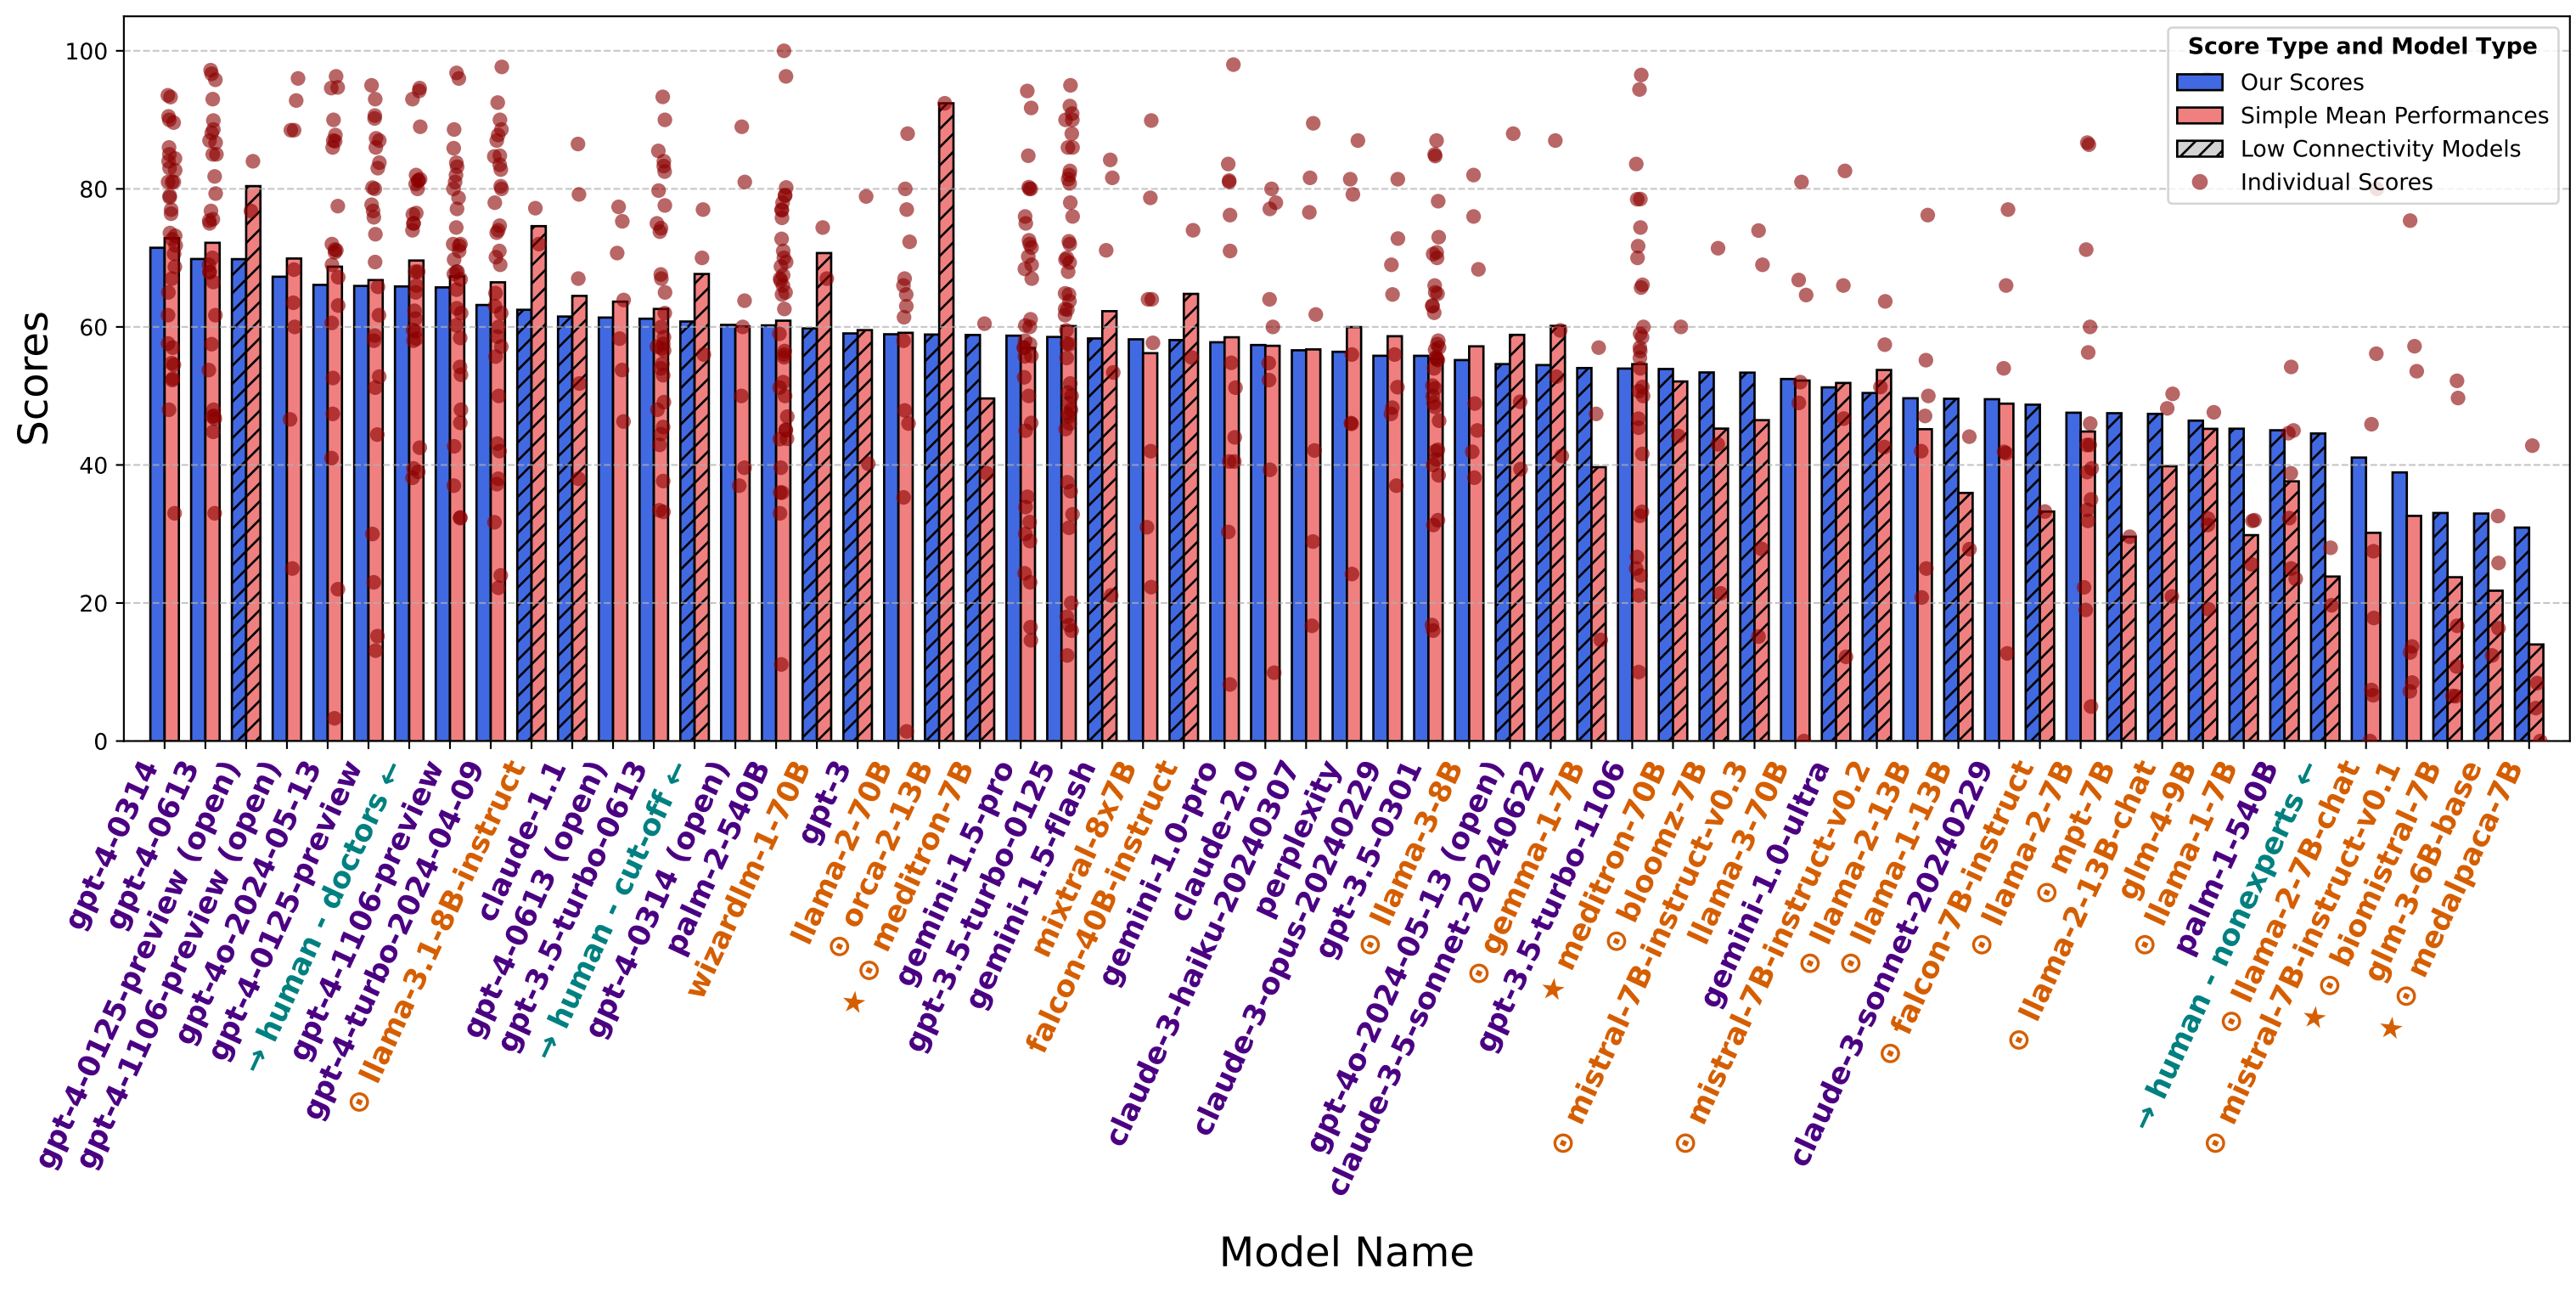

Supplement: SupplementaryMaterial [file 2025.bionlp-1.24.SupplementaryMaterial.zip]

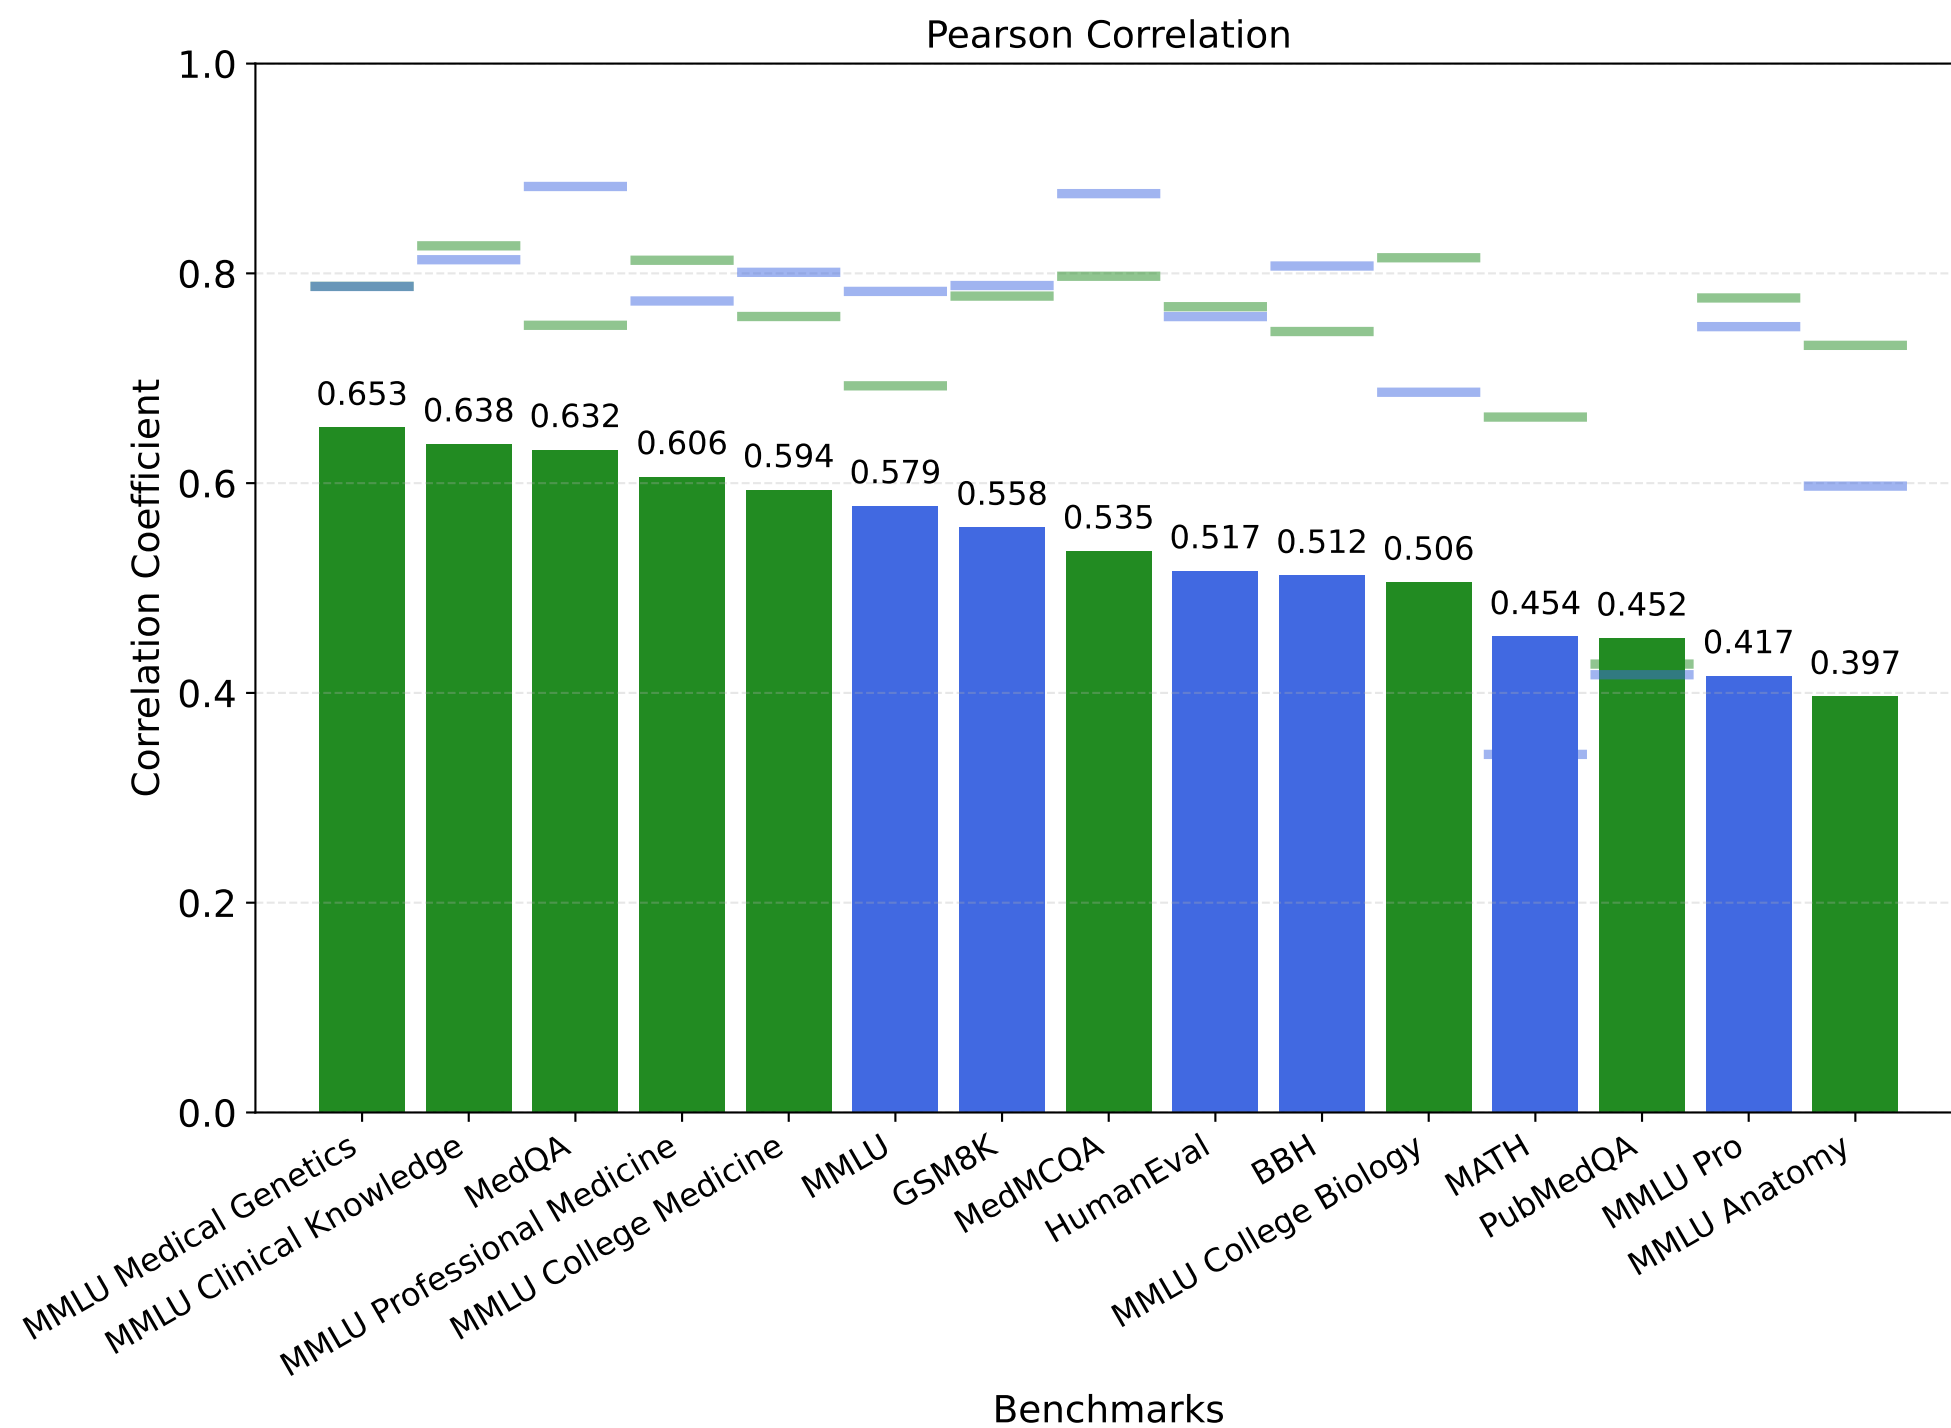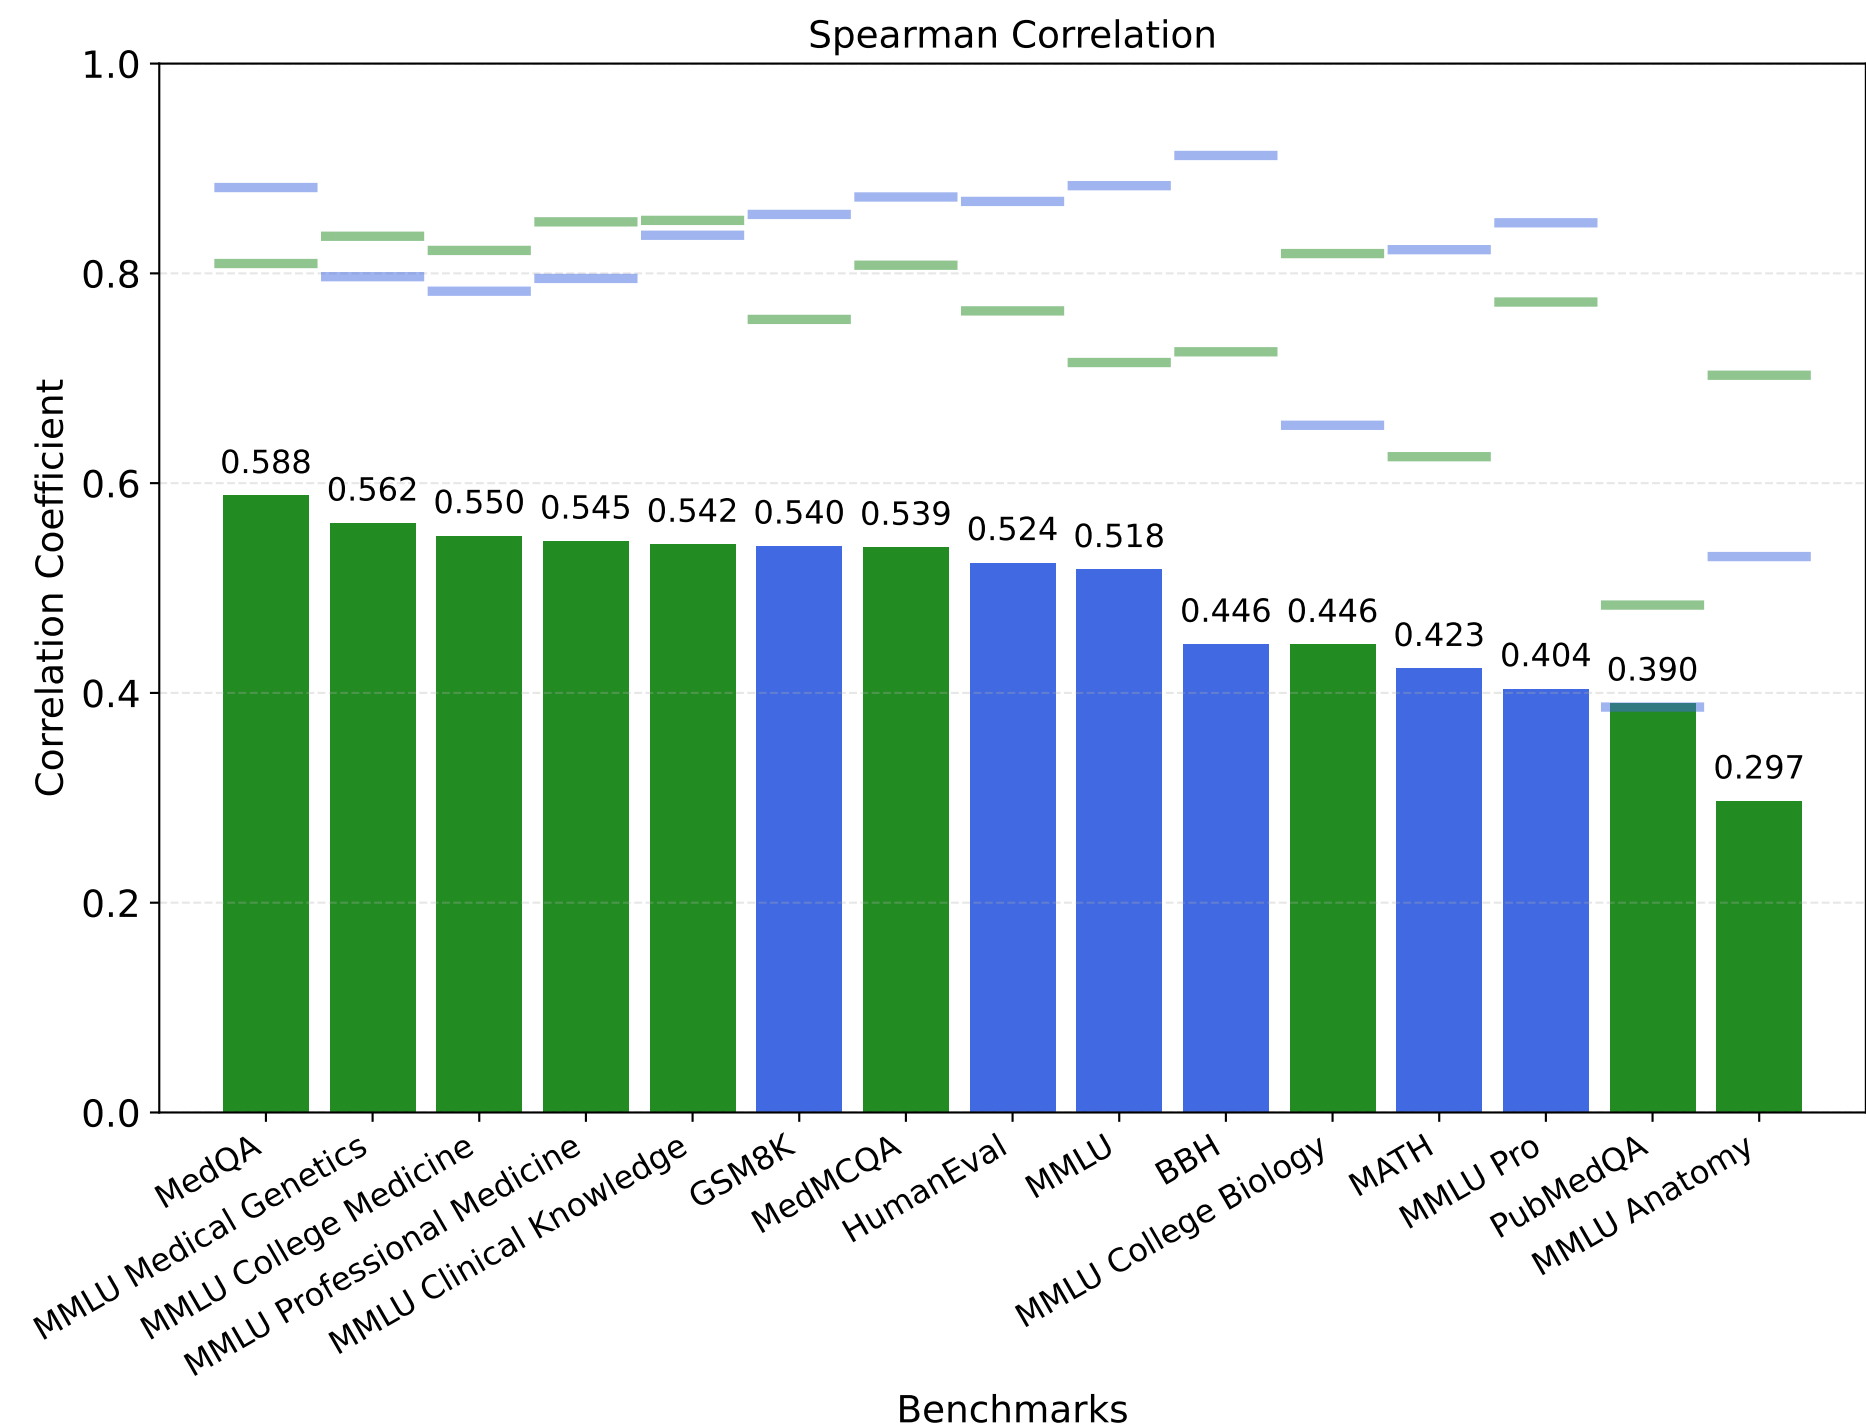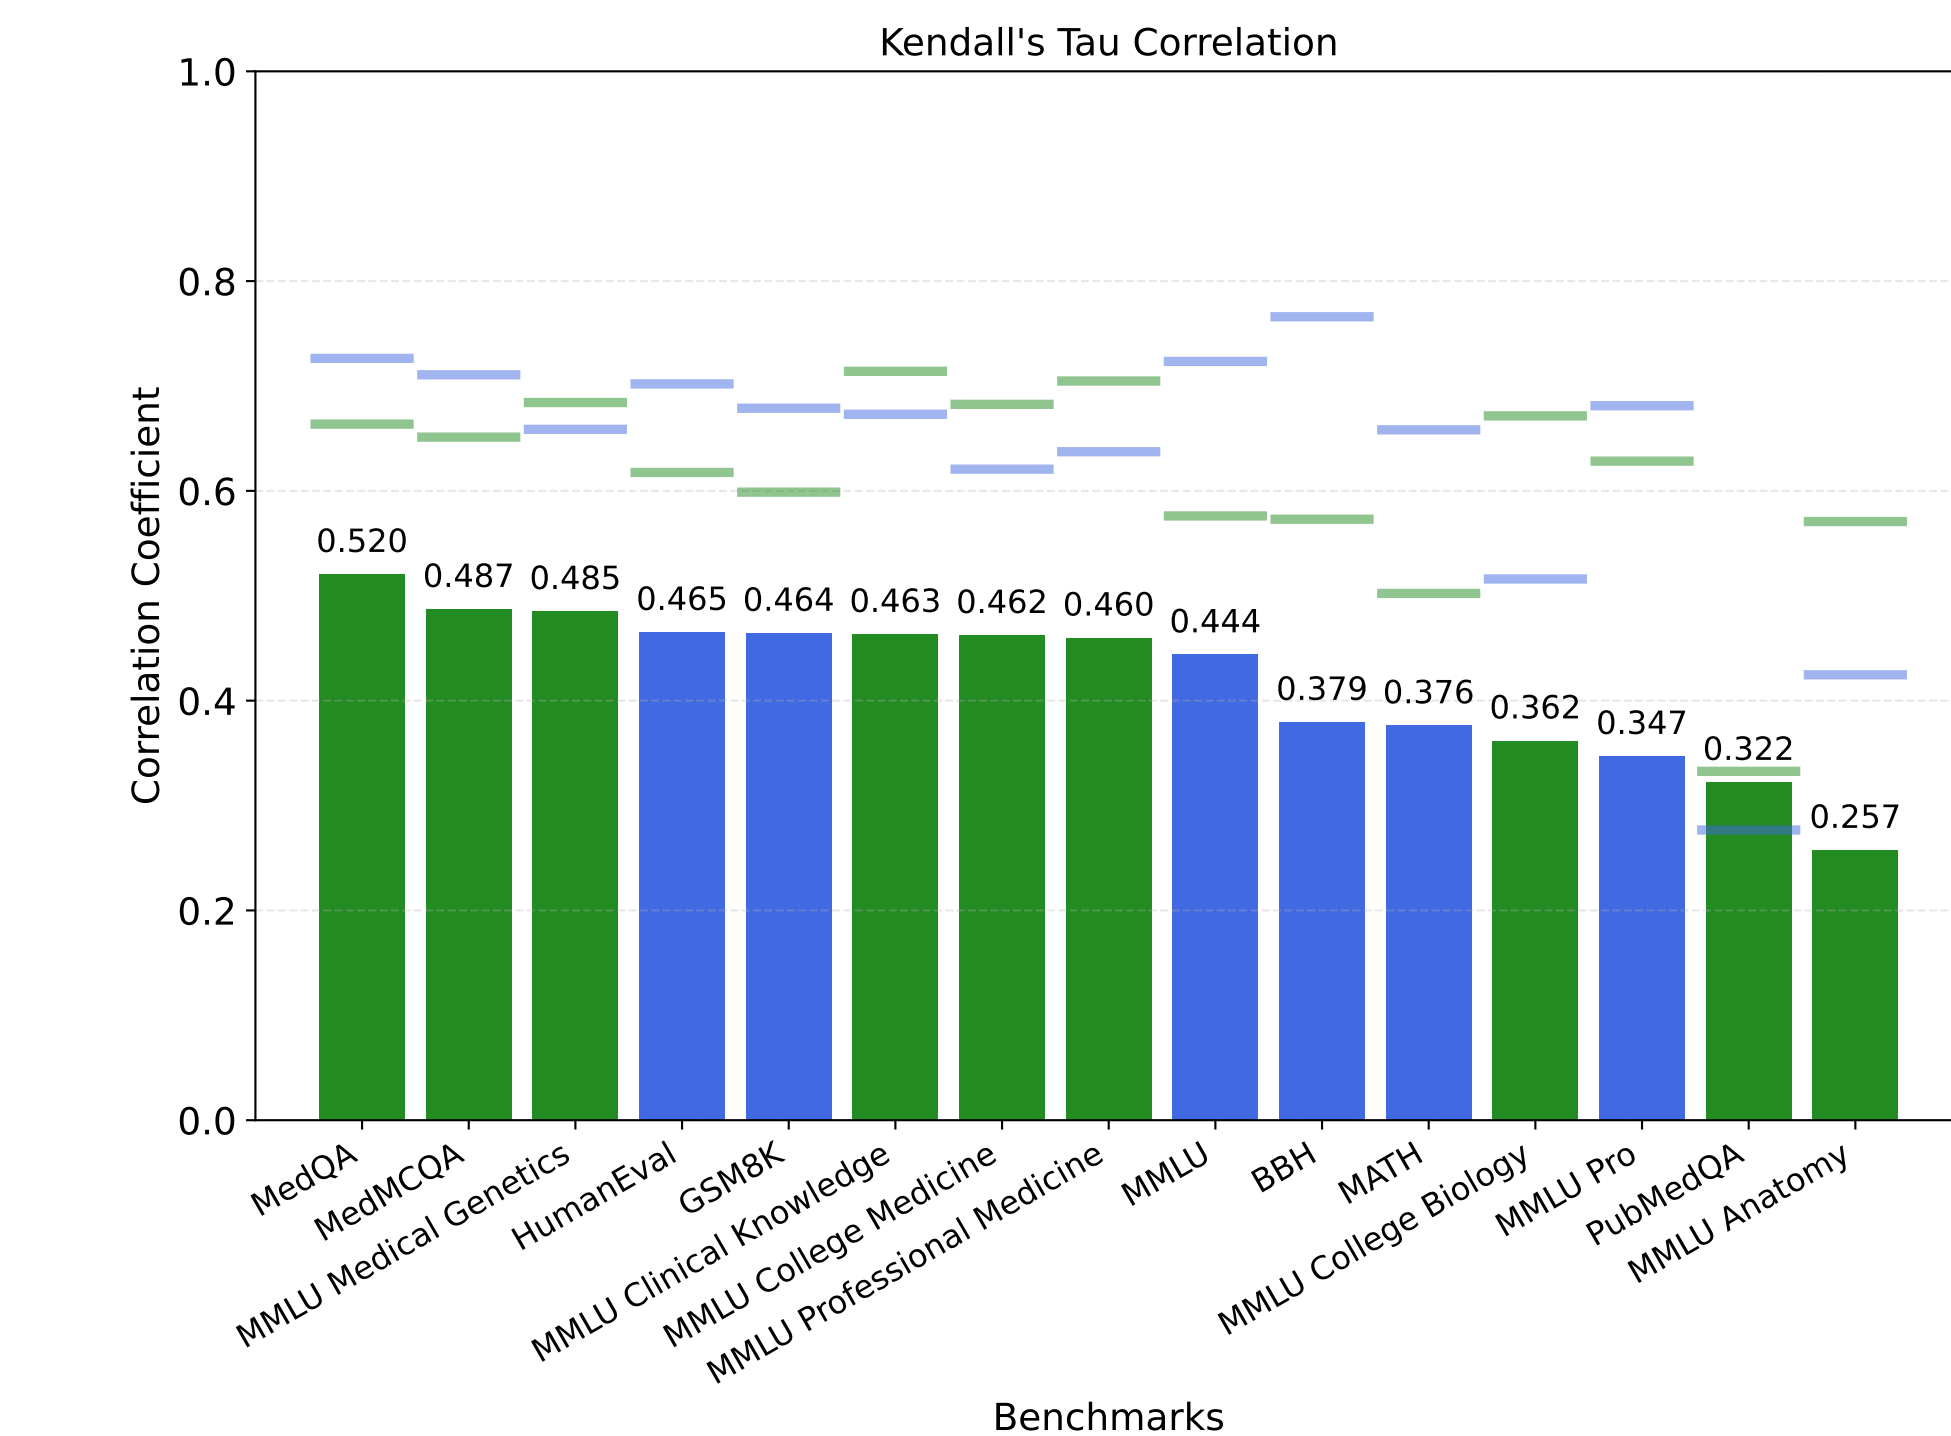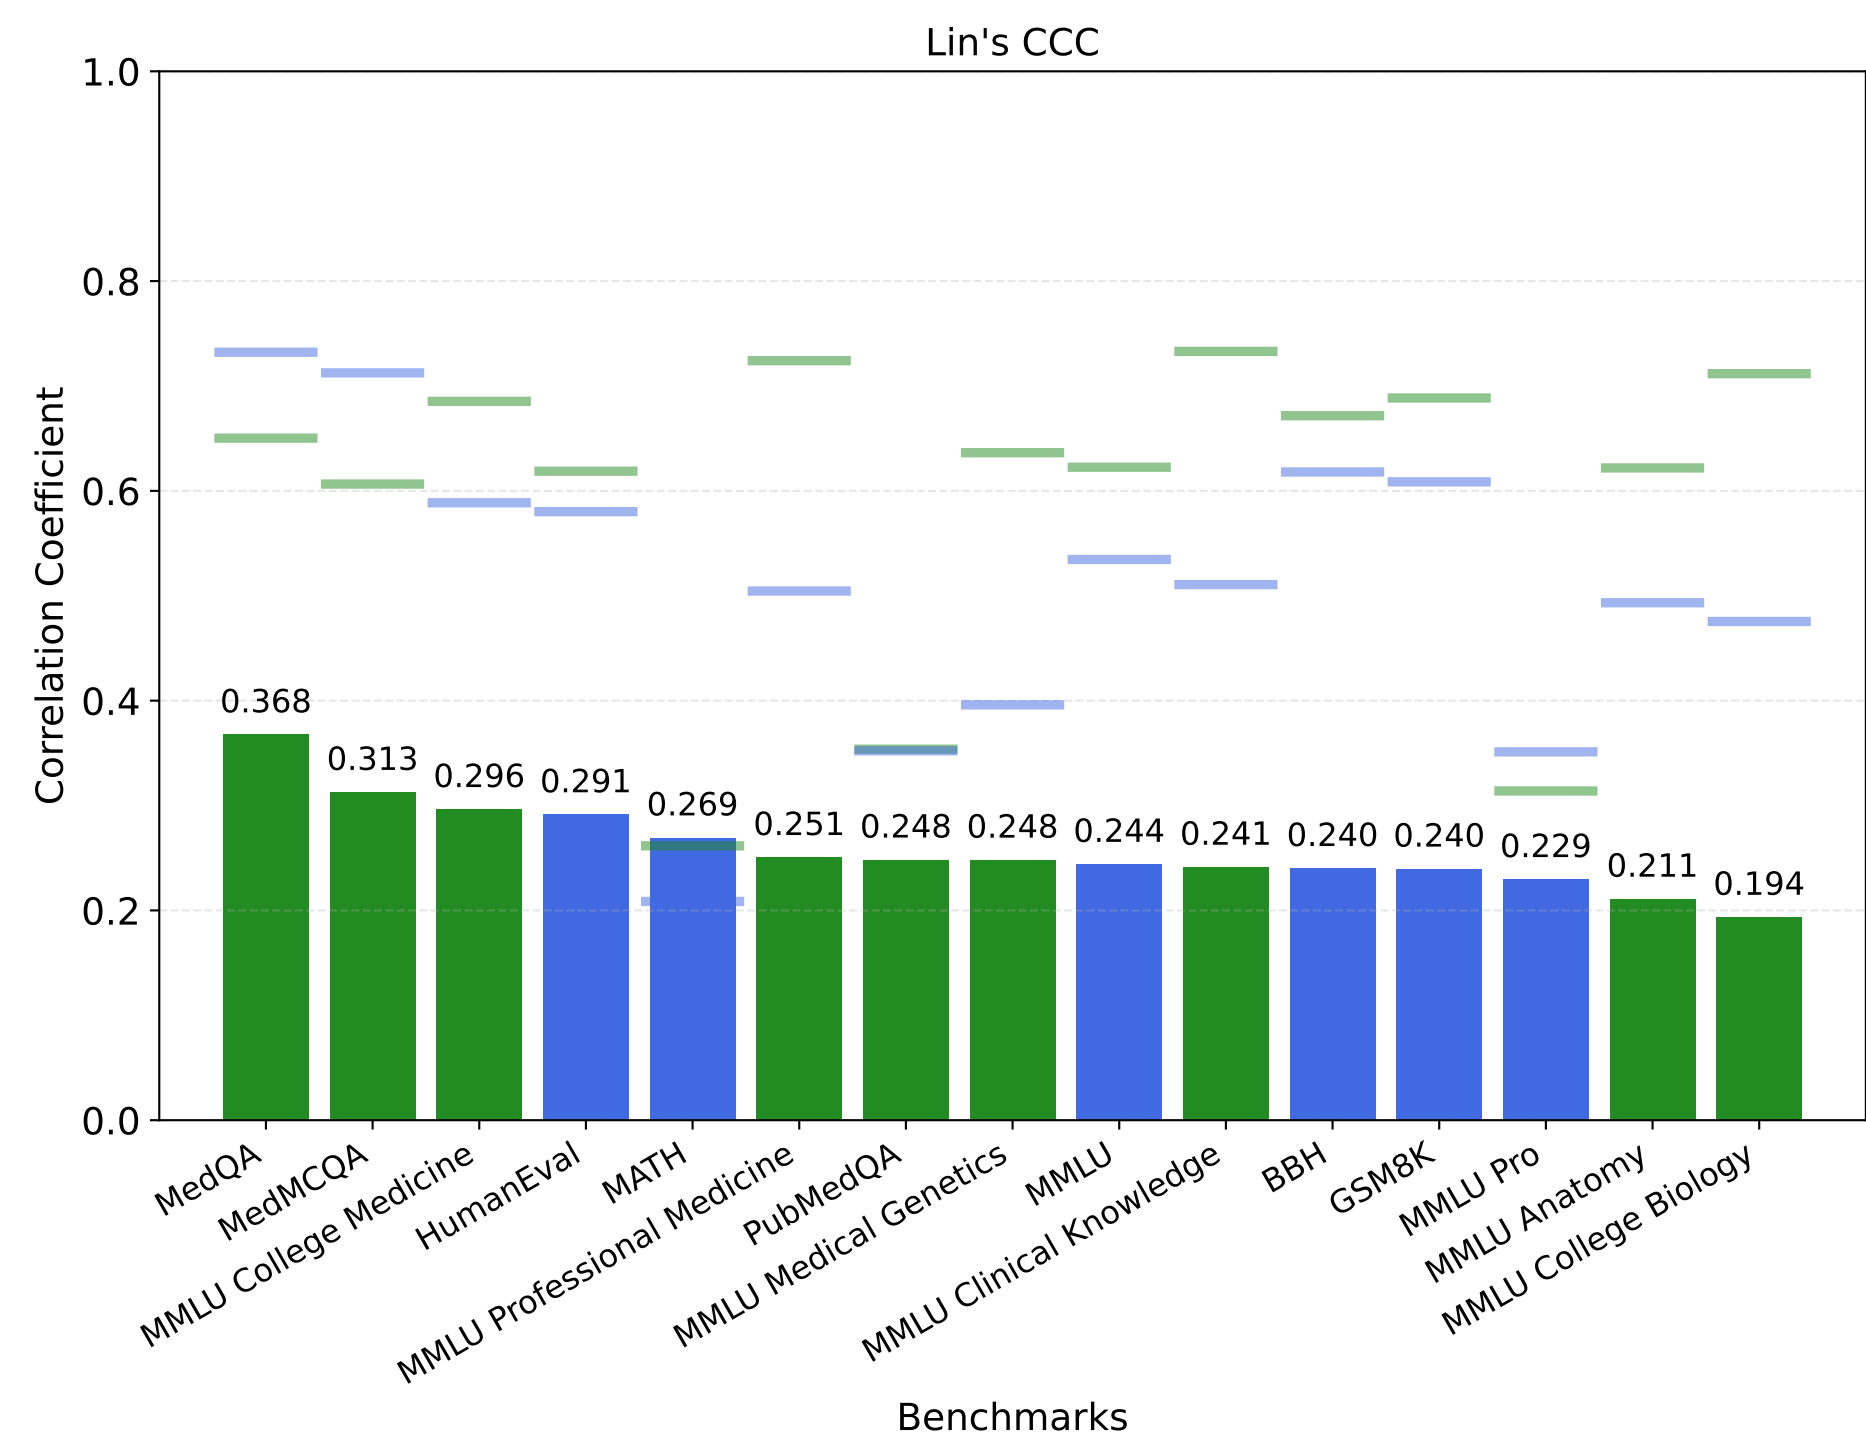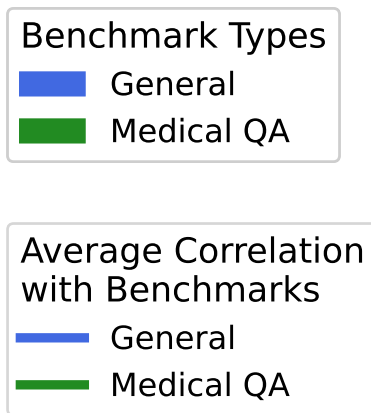

Supplement: SupplementaryMaterial [file 2025.bionlp-1.24.SupplementaryMaterial.zip]

(A) Pearson Correlation

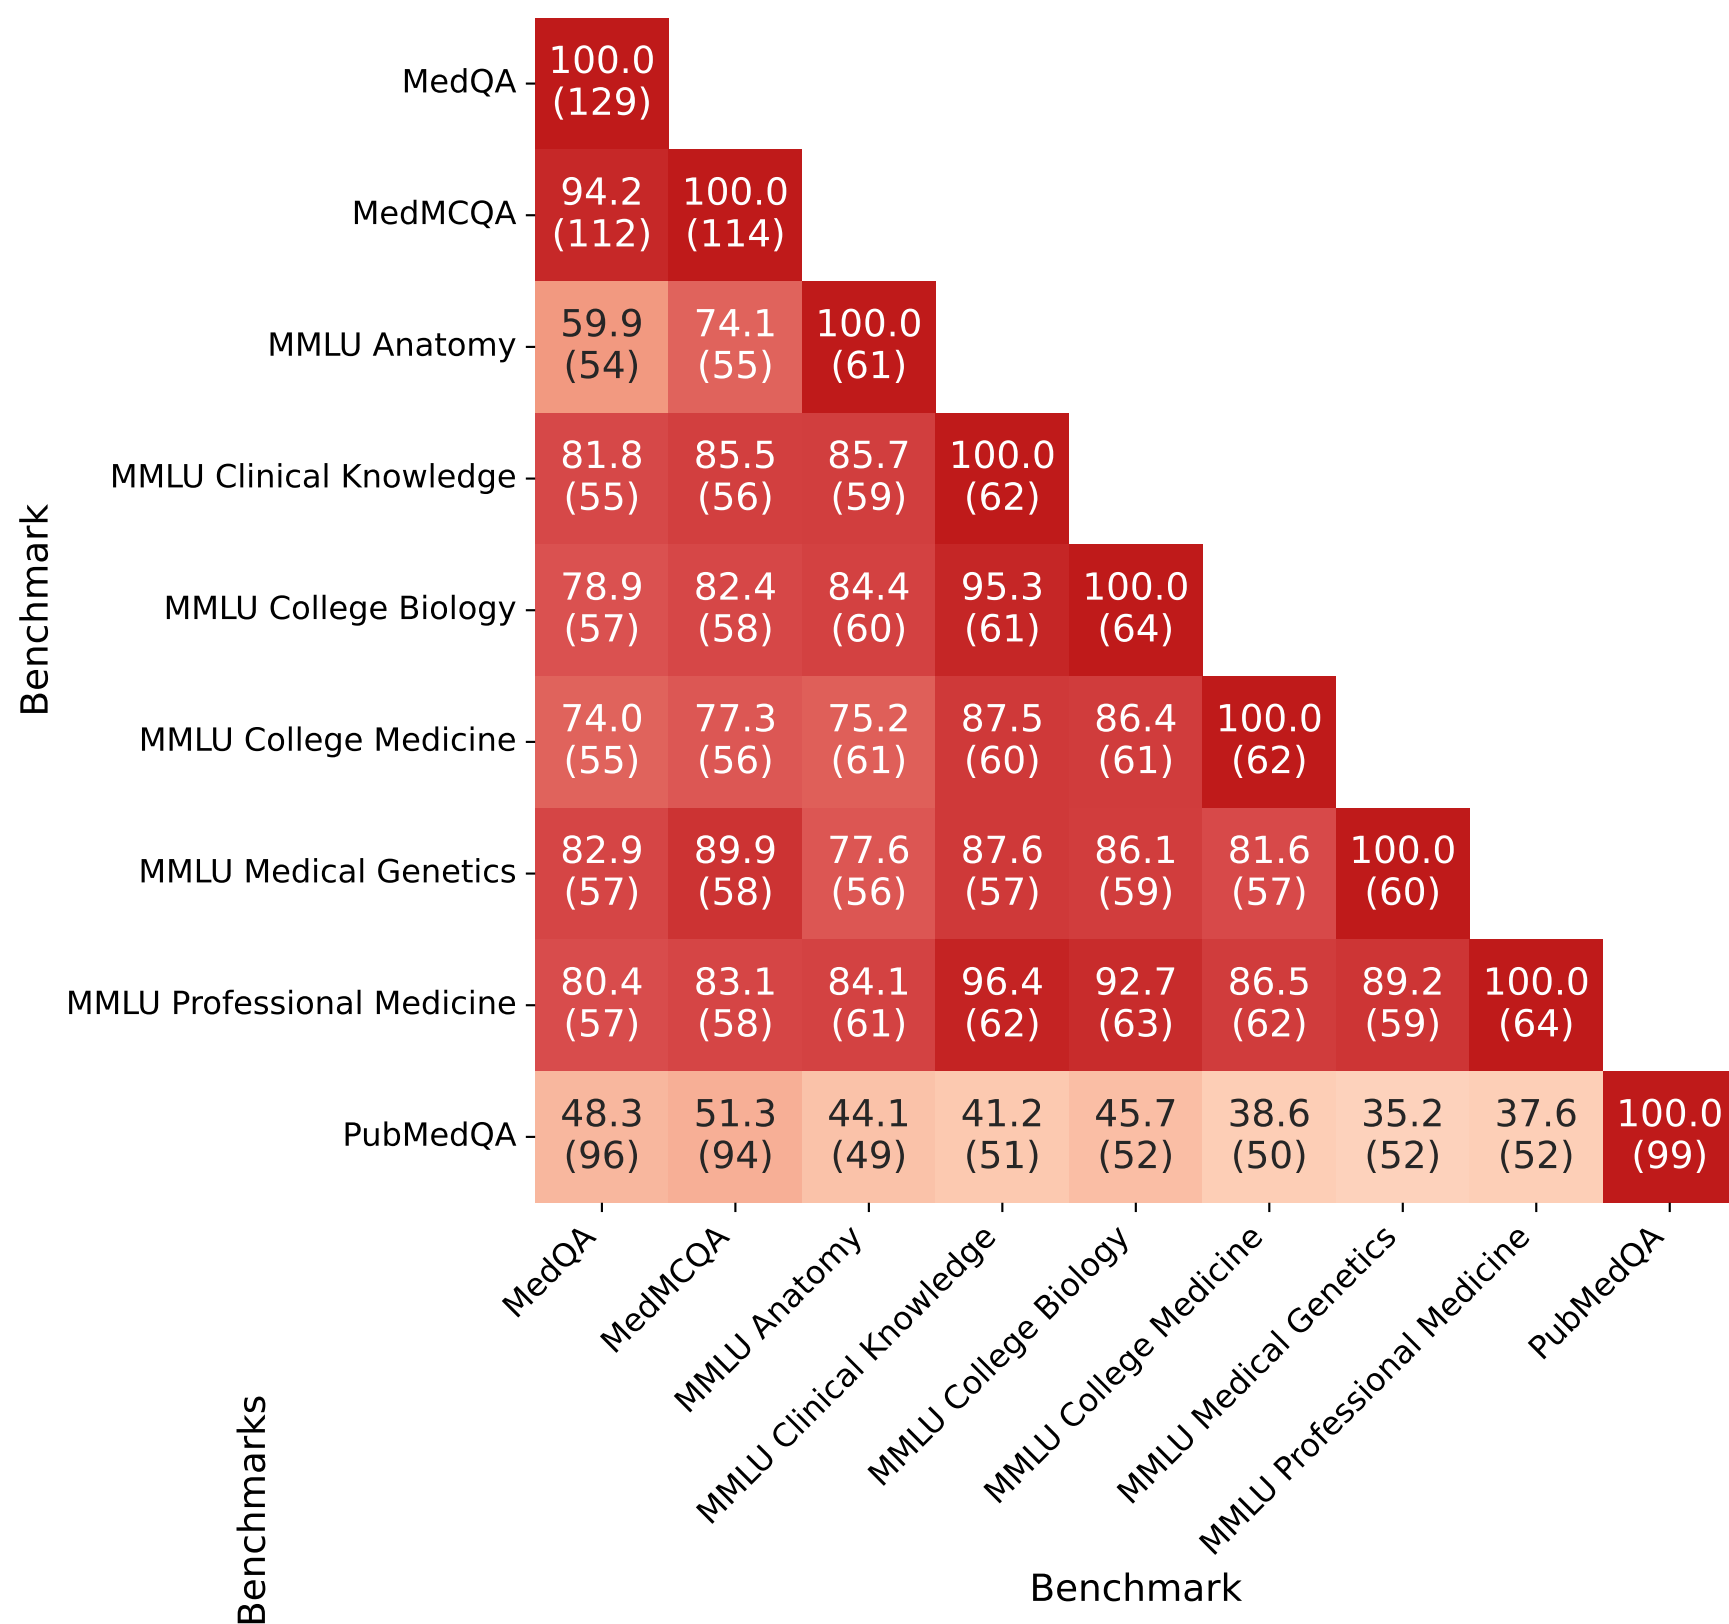

(B) Spearman Correlation

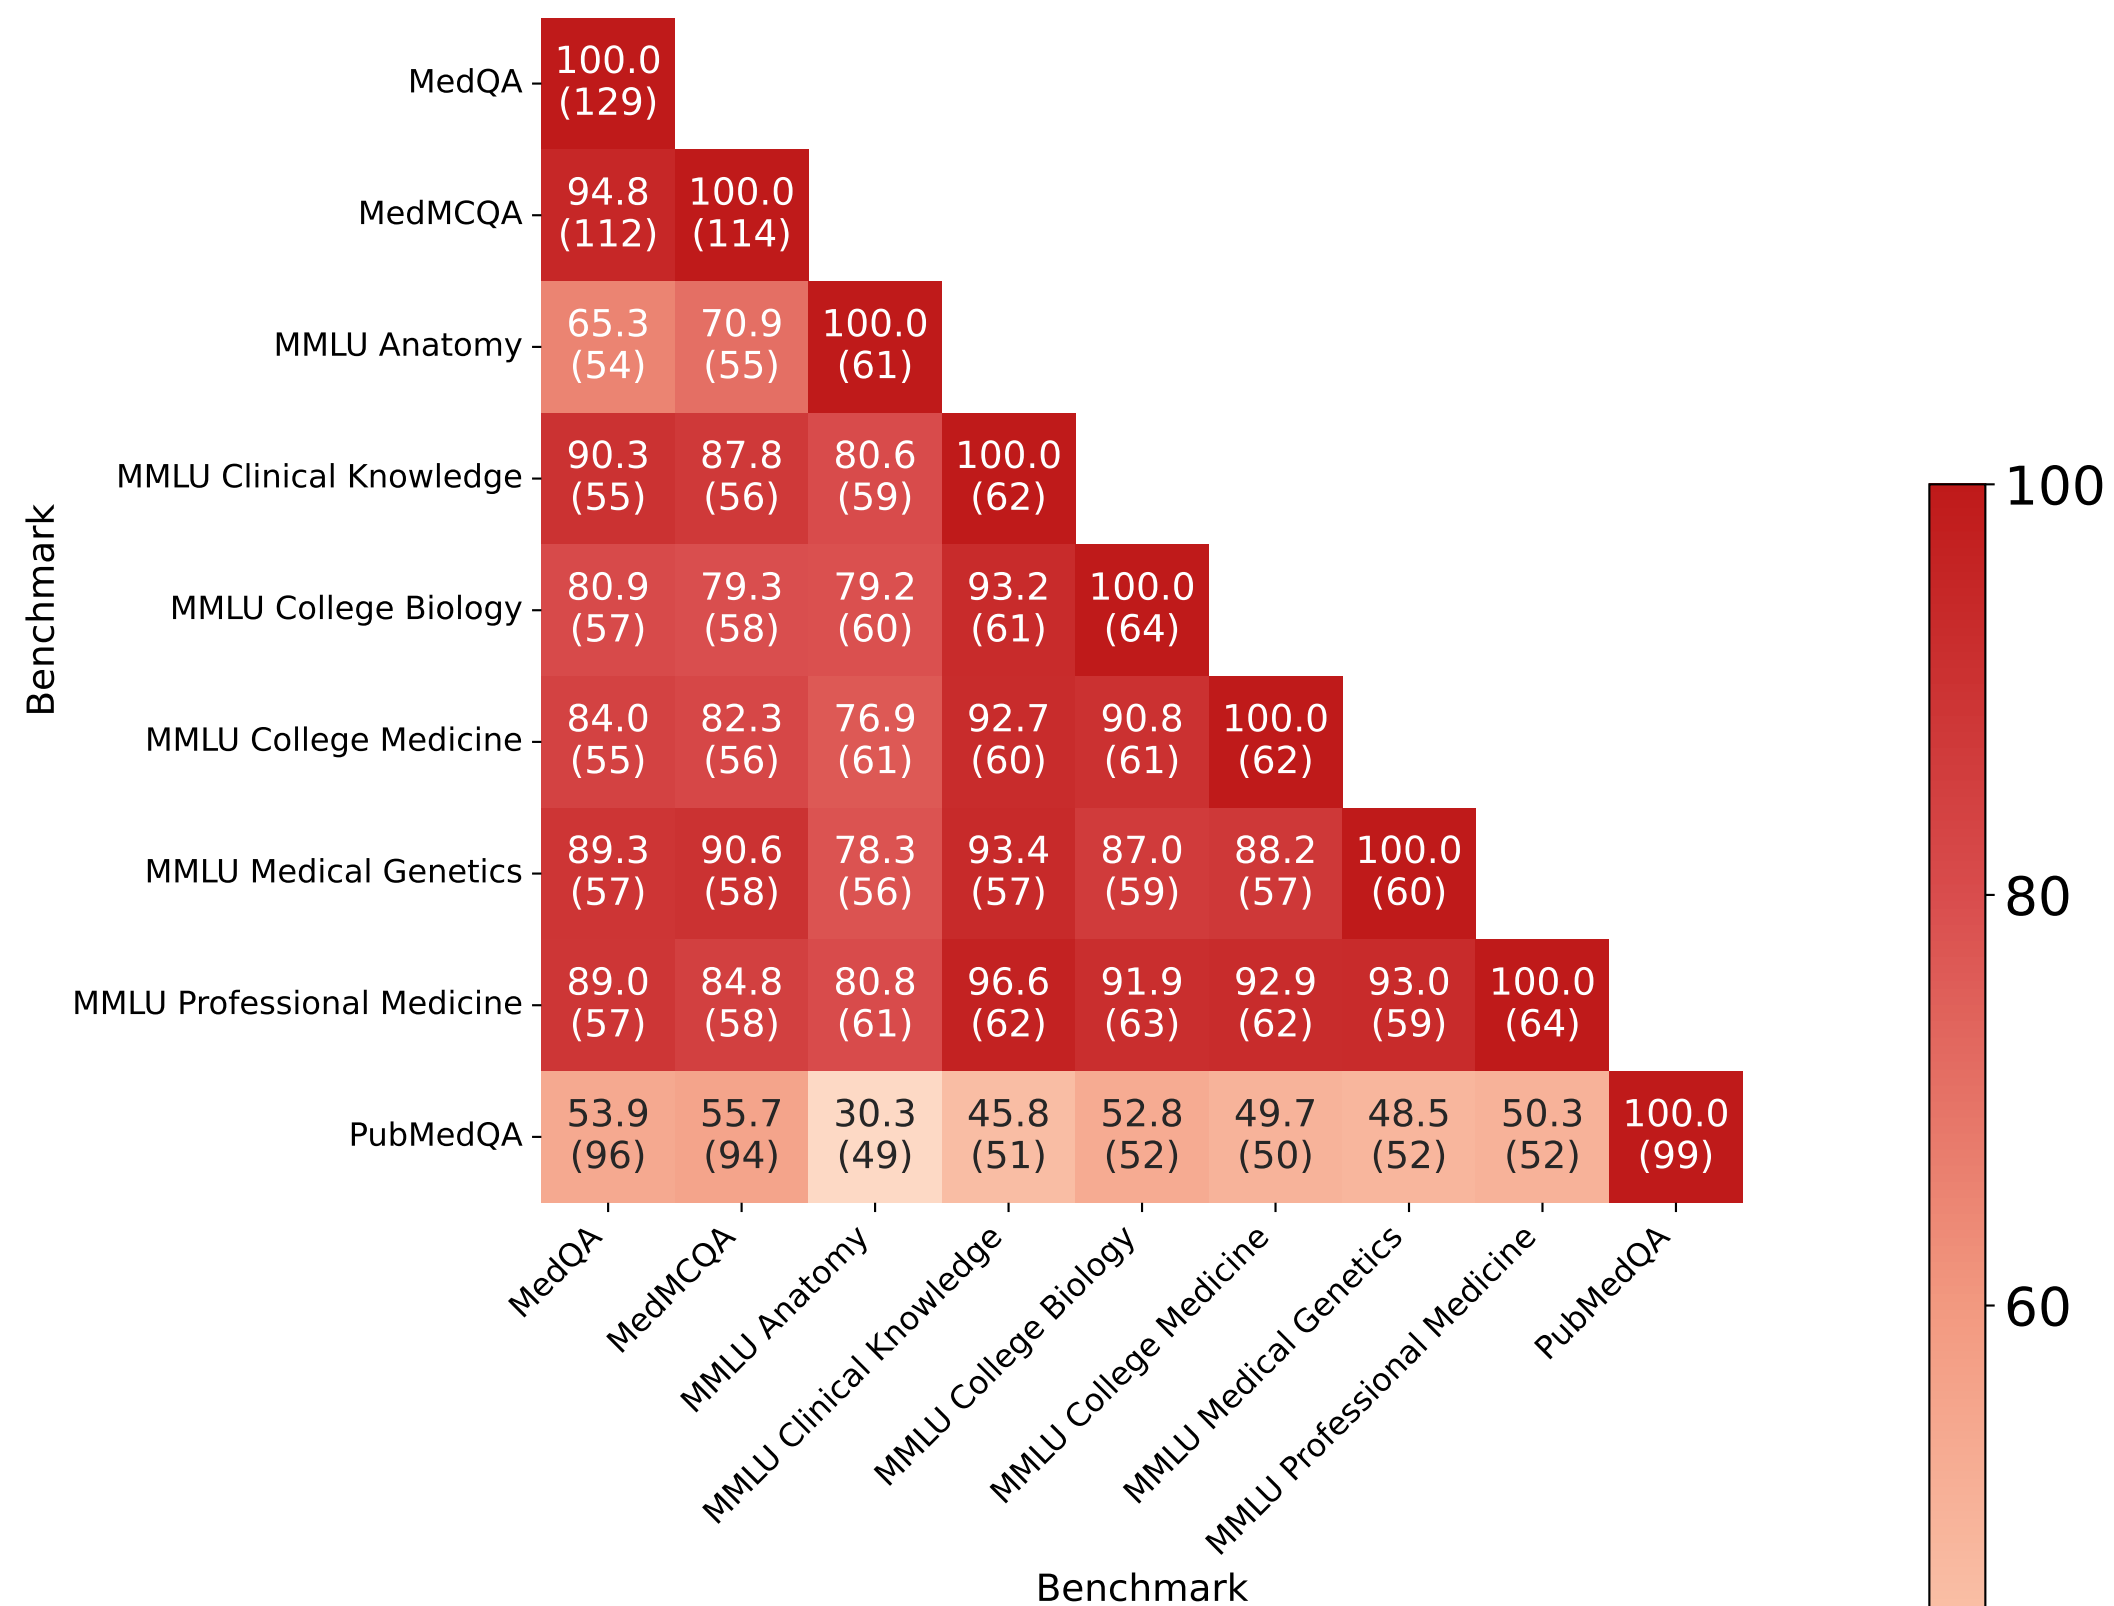

(C) Kendall's Tau Correlation

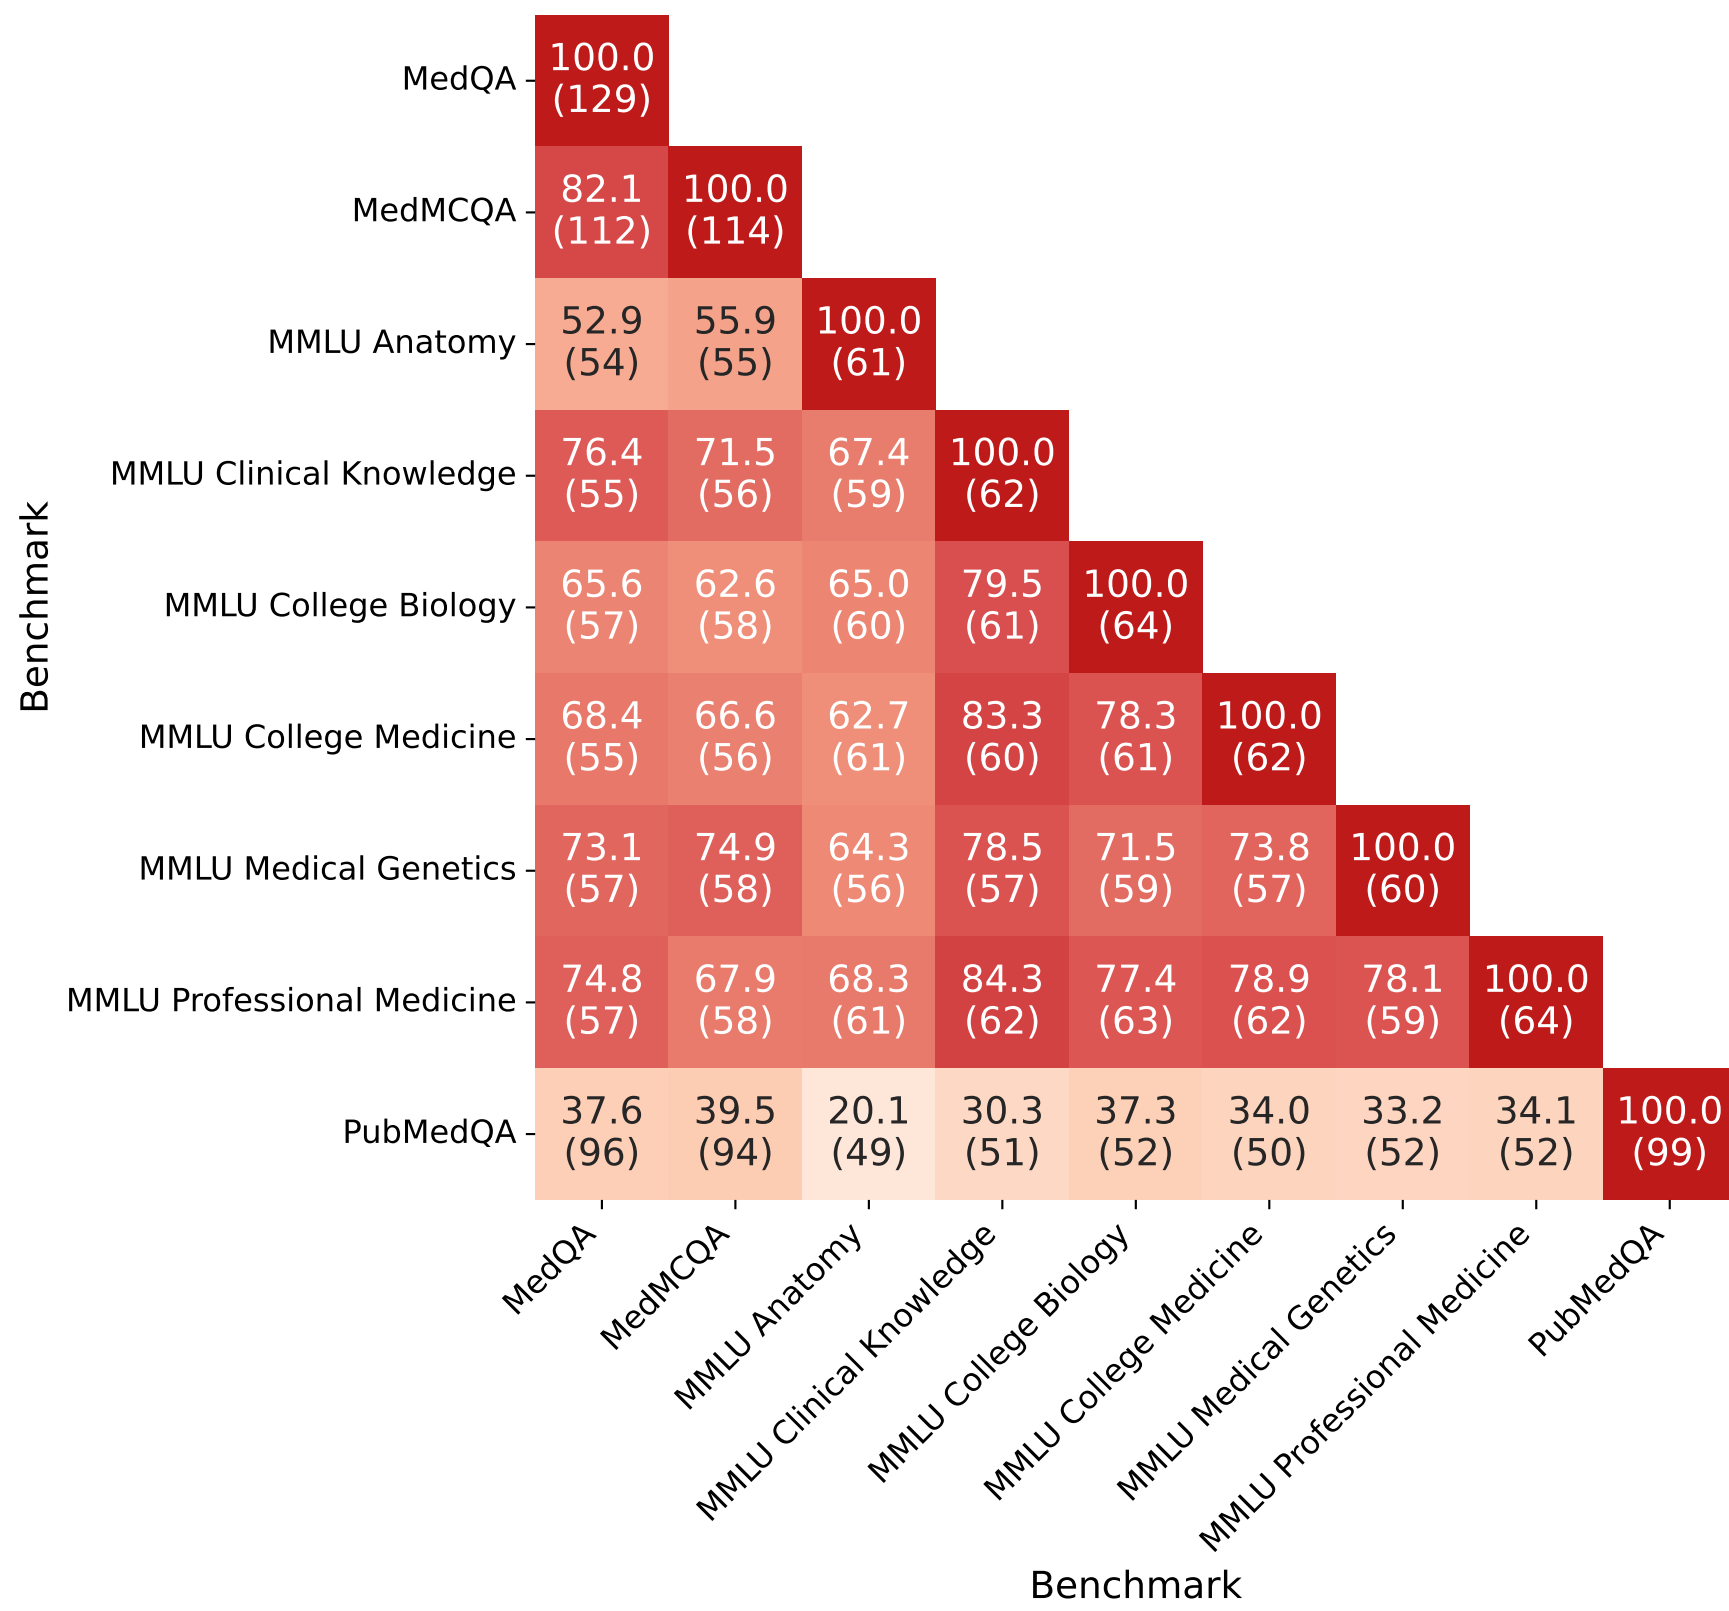

(D) Lin's CCC

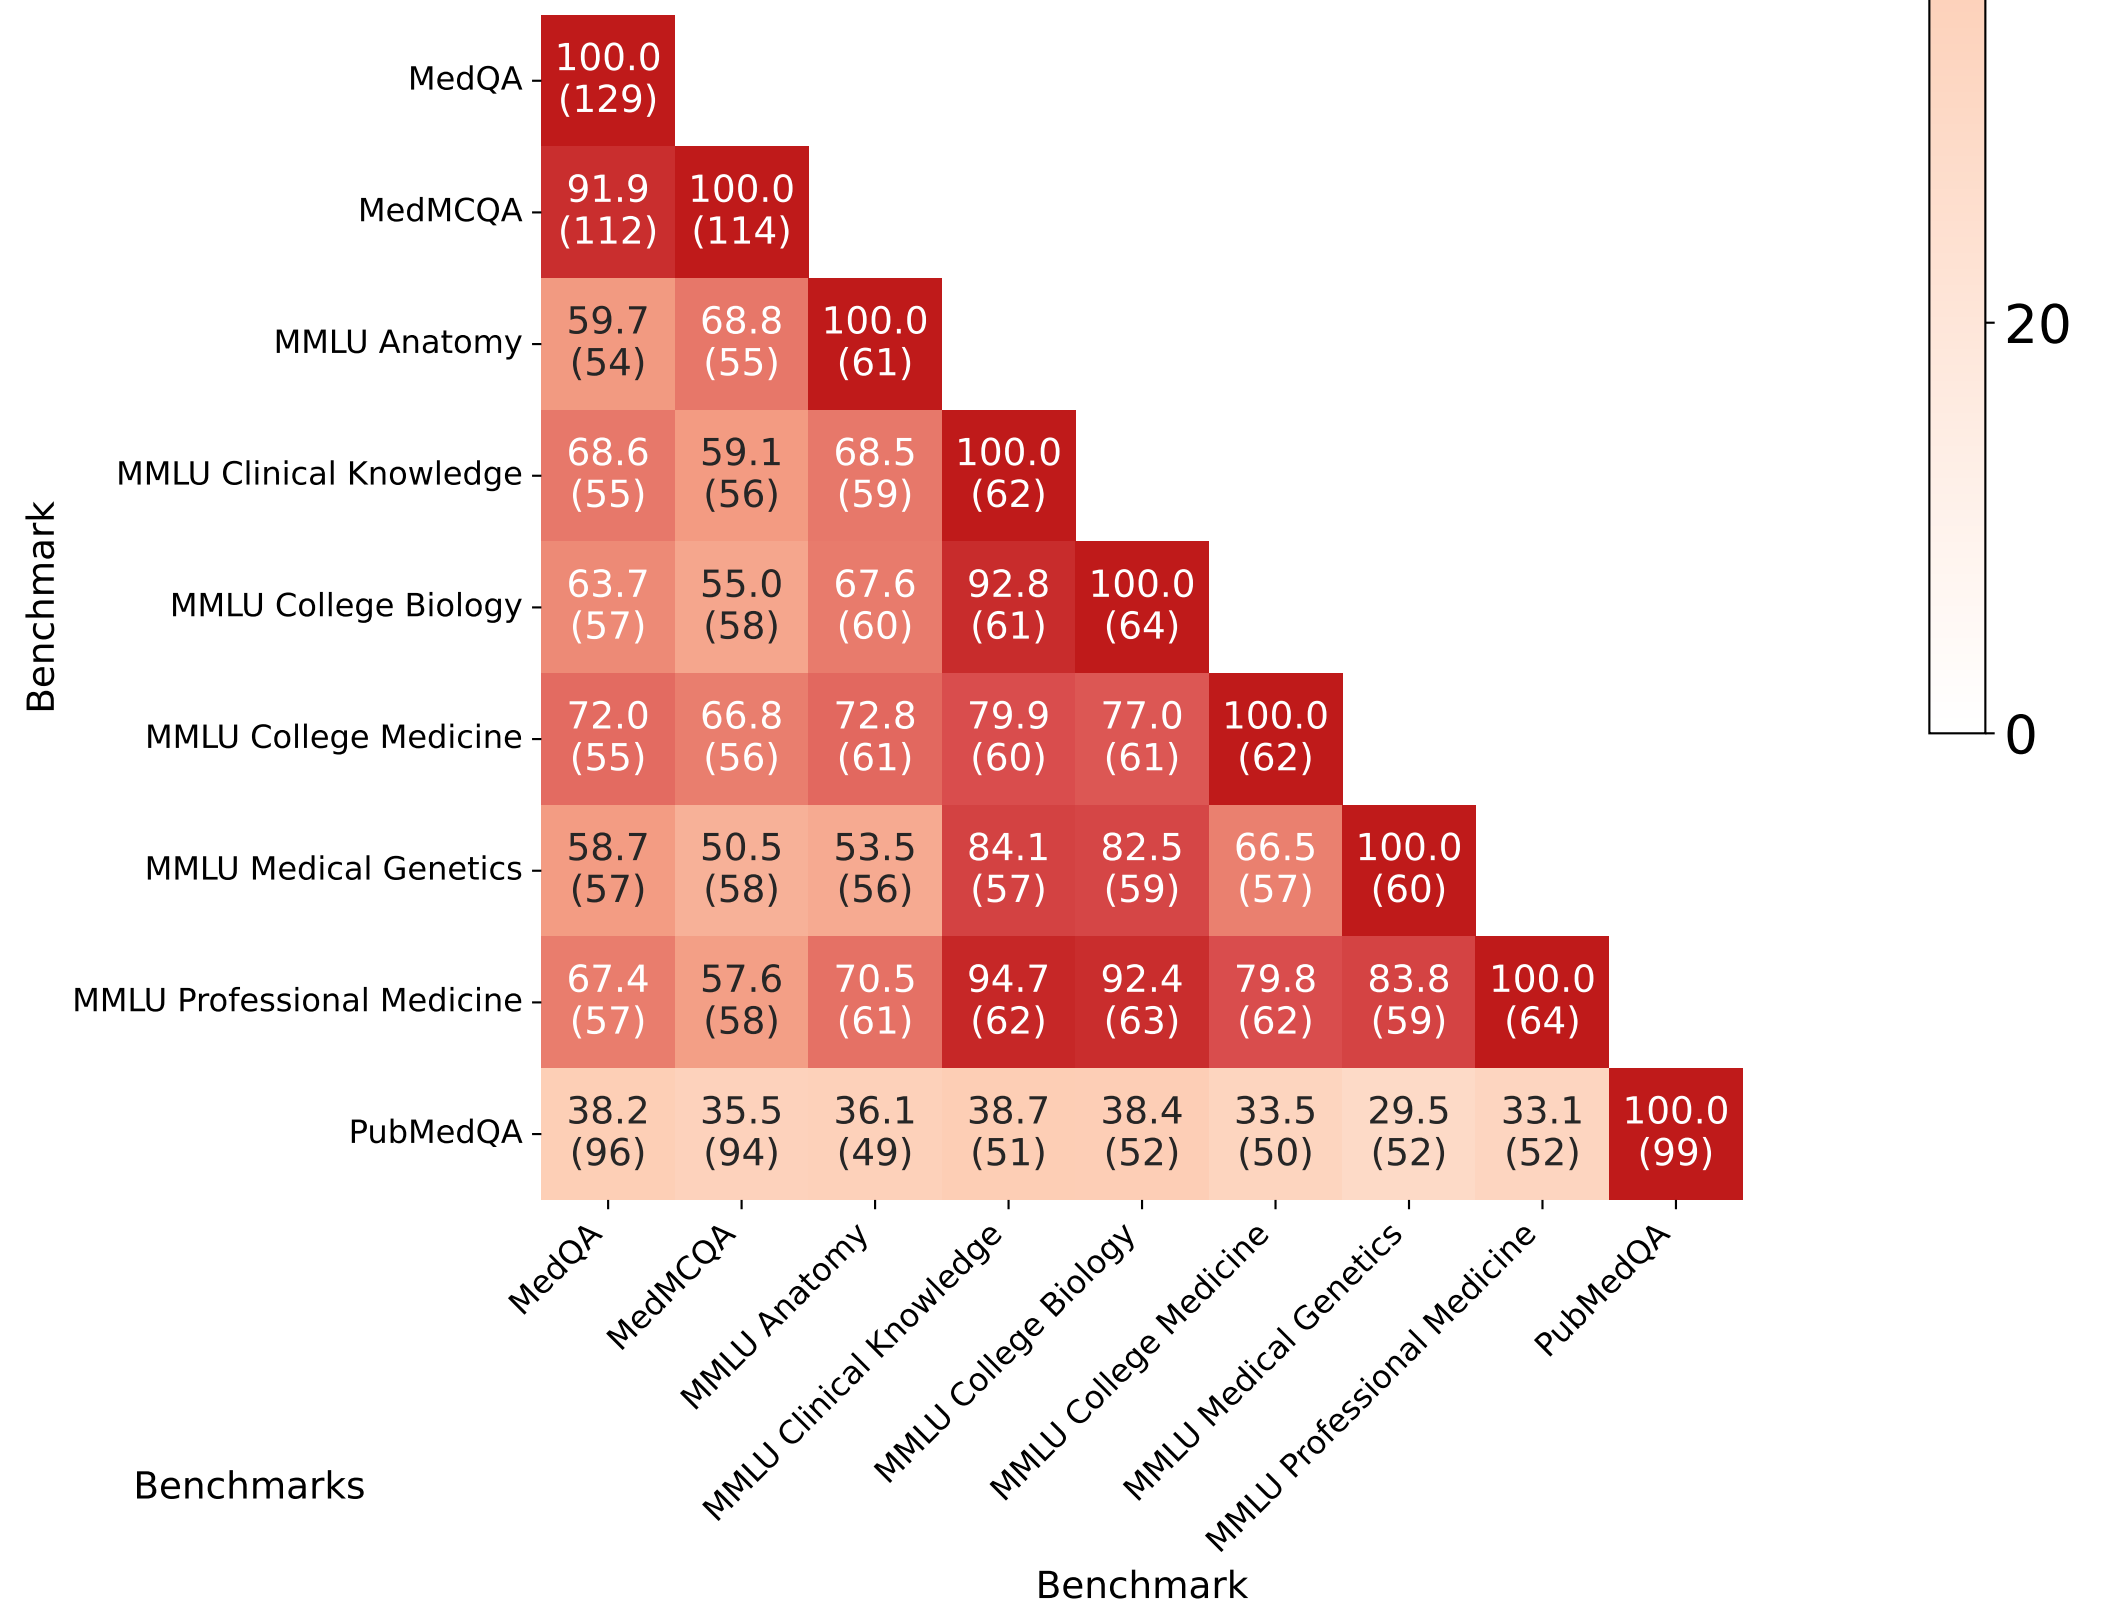

Supplement: SupplementaryMaterial [file 2025.bionlp-1.24.SupplementaryMaterial.zip]

**(A) Pearson Correlation**

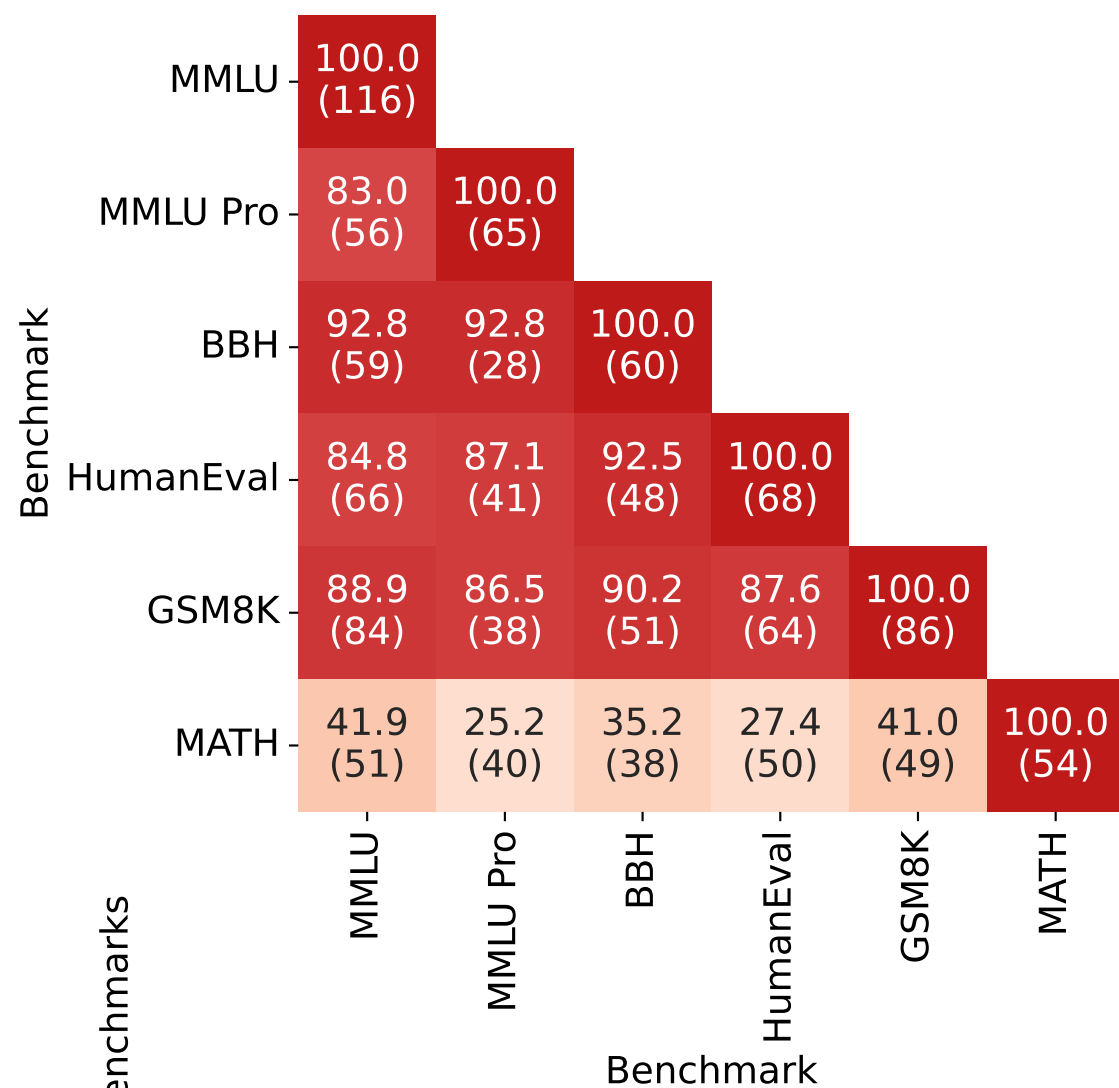

**(B) Spearman Correlation**

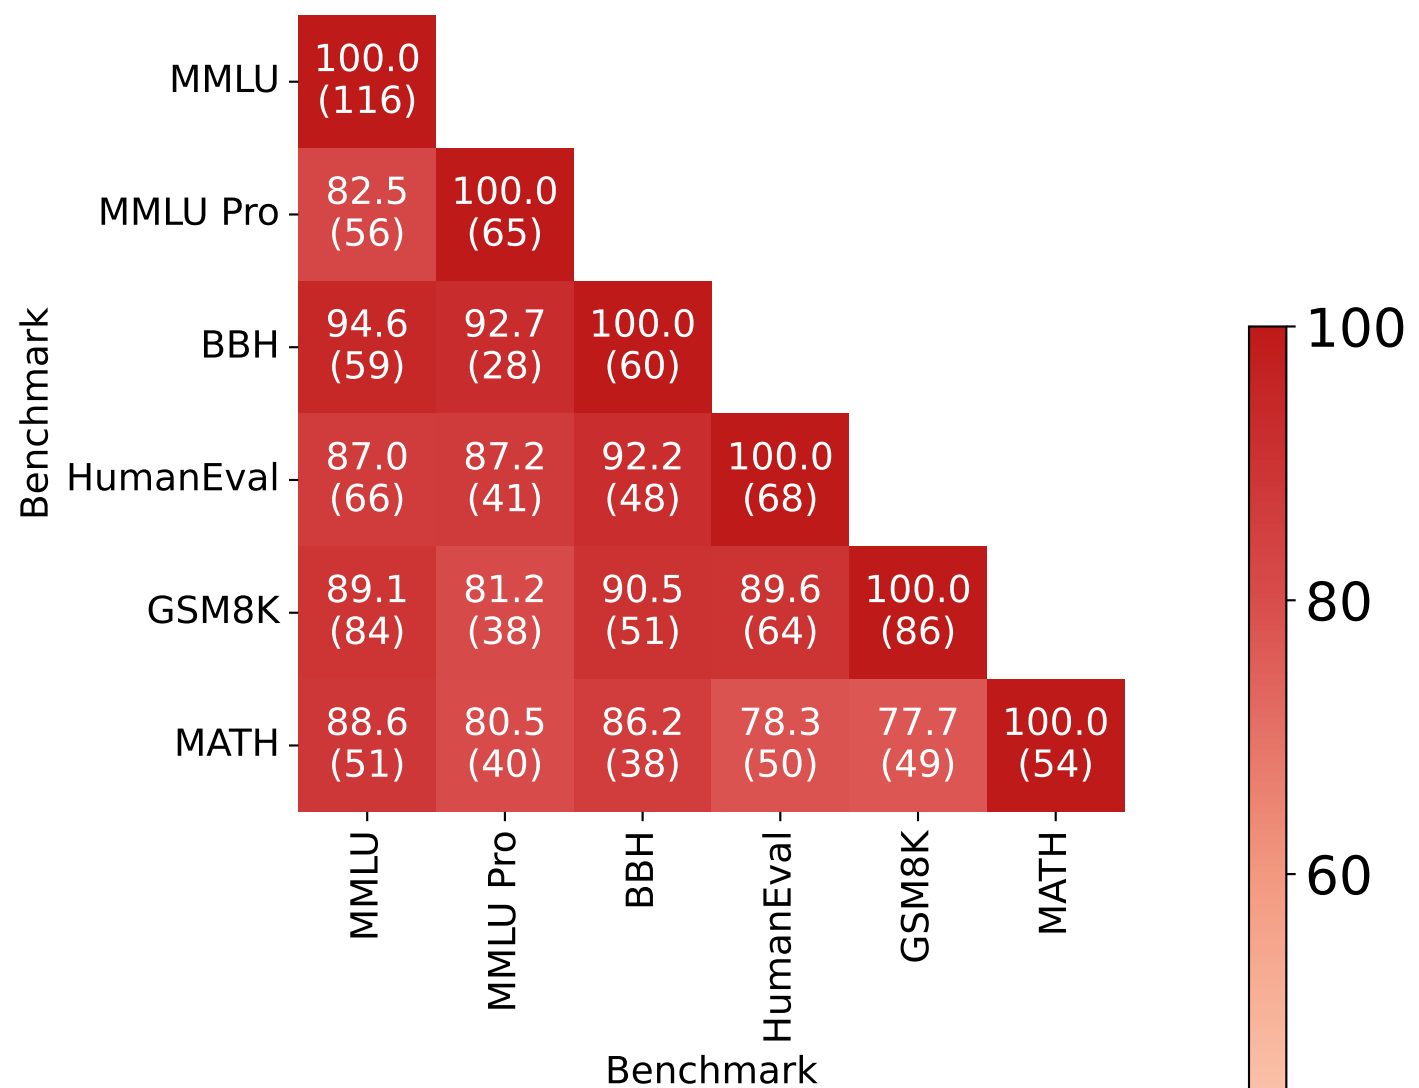

**(C) Kendall's Tau Correlation**

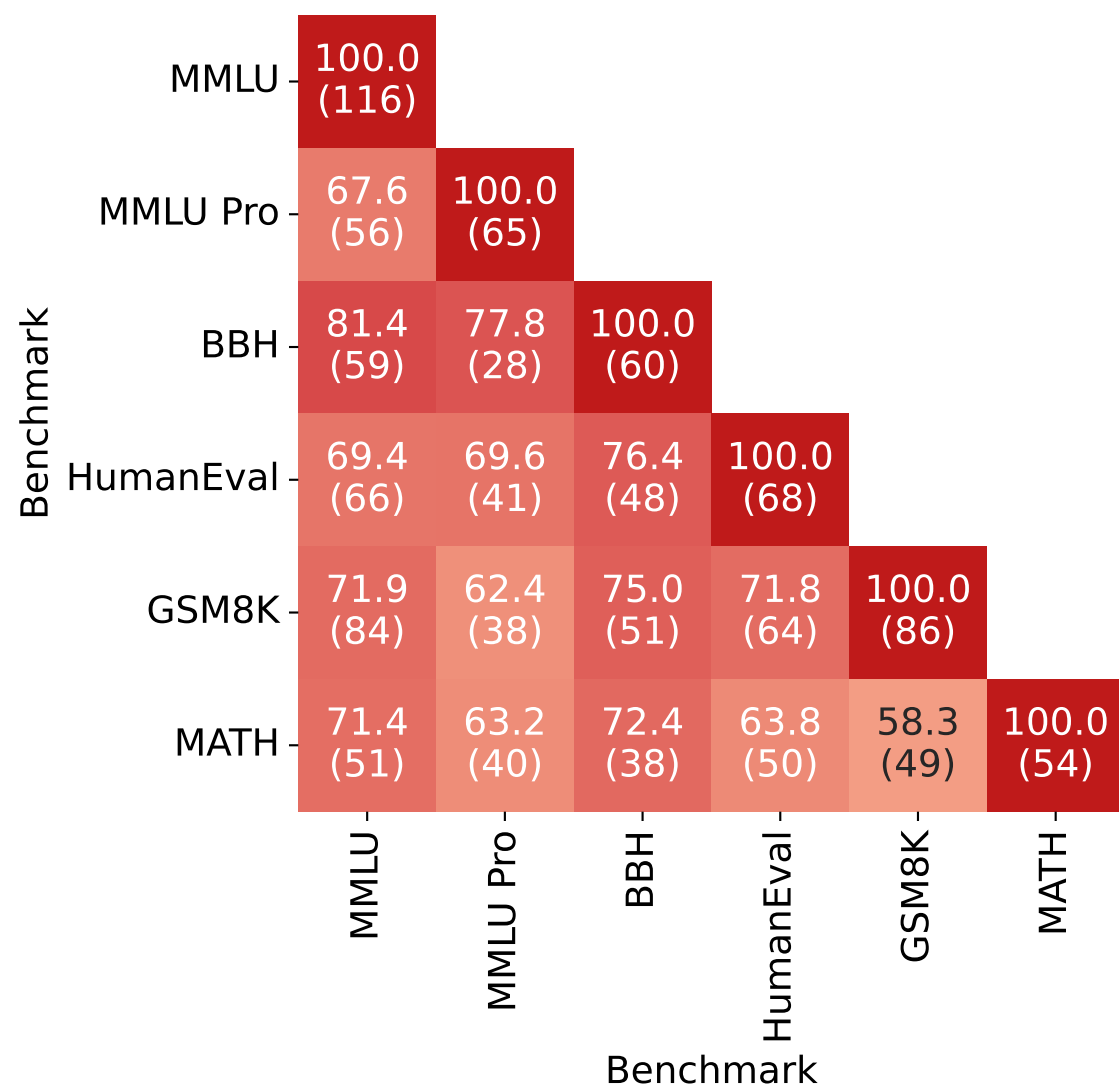

**(D) Lin's CCC**

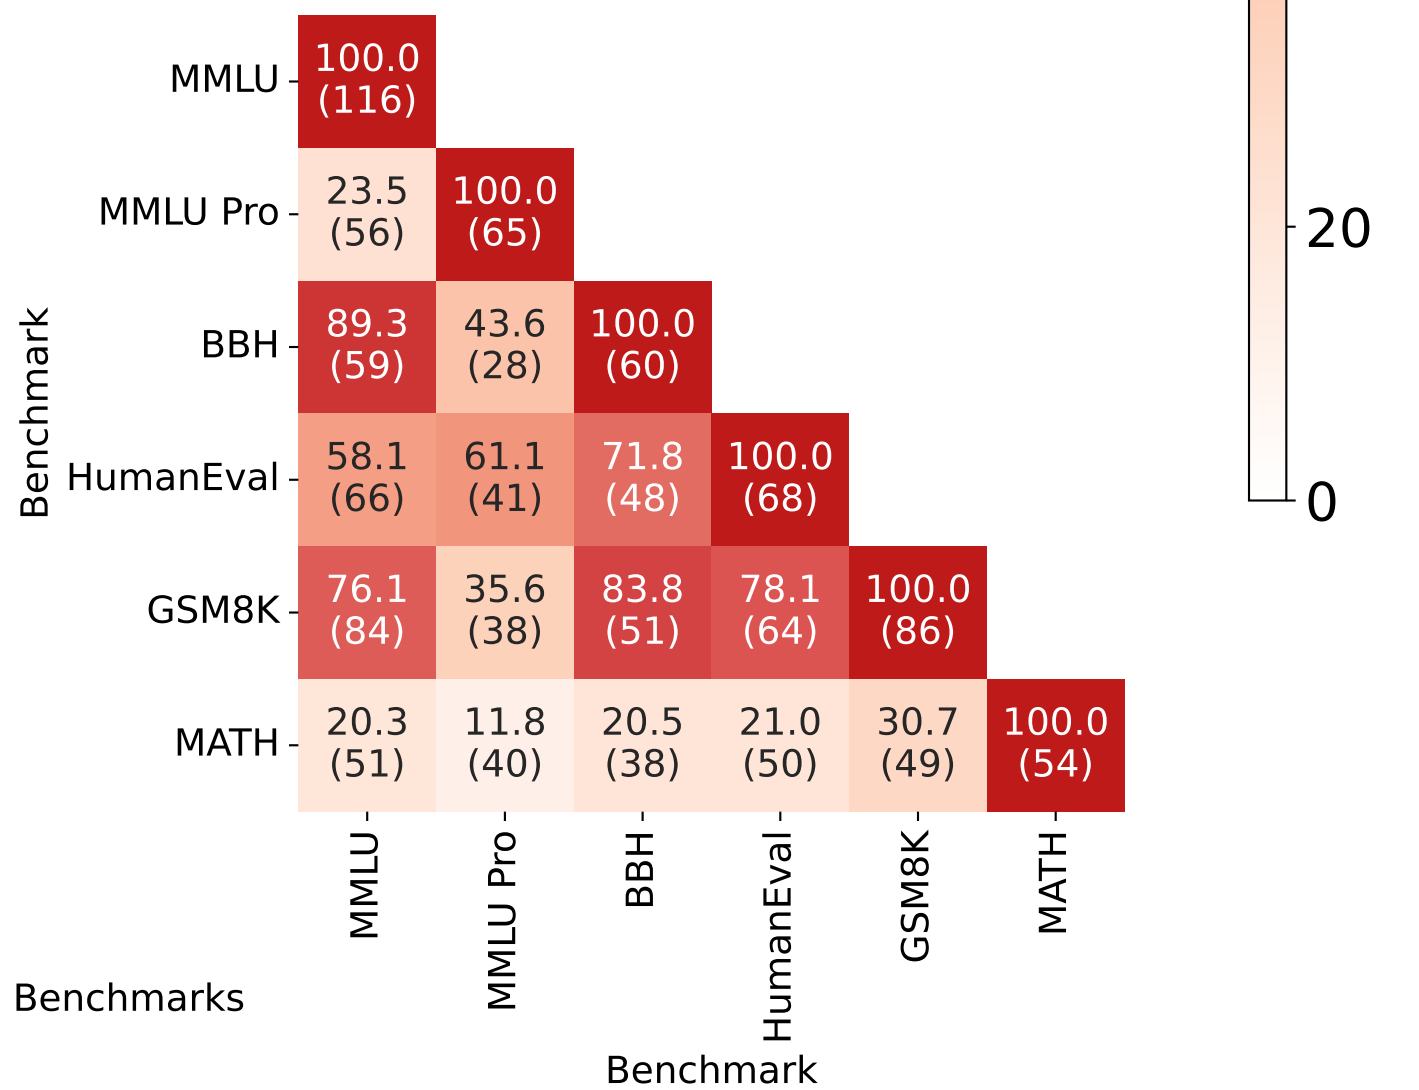

Supplement: SupplementaryMaterial [file 2025.bionlp-1.24.SupplementaryMaterial.zip]
